# Supplementary material
Source: PubMed Central journal article supplement (PMC3502975)
Supplement: JCM.00626-12_zjm999092076so1.pdf [file JCM.00626-12_zjm999092076so1.pdf]

Table S1: MALDI-TOF MS data for all 690 isolates tested by the extraction method.

| Isolate No. | Standard Method Identification (ID)           | Standard ID classification <sup>1</sup> | Standard ID Method <sup>2</sup> | MSP <sup>3</sup> frequency (3995 DB) | Biotyper ID                          | Biotyper Score | Biotyper Consistency Category |
|-------------|-----------------------------------------------|-----------------------------------------|---------------------------------|--------------------------------------|--------------------------------------|----------------|-------------------------------|
| 110         | <i>Abiotrophia defectiva</i>                  | S                                       | 16S                             | 3                                    | <i>Abiotrophia defectiva</i>         | 2.303          | A                             |
| 420         | <i>Achromobacter sp.</i>                      | G                                       | 16S                             | Not applicable                       | <i>Achromobacter ruhlandii</i>       | 2.162          | B                             |
| 59          | <i>Achromobacter xylosoxidans</i>             | S                                       | 16S                             | 5                                    | <i>Achromobacter xylosoxidans</i>    | 2.253          | B                             |
| 442         | <i>Achromobacter xylosoxidans</i>             | S                                       | 16S                             | 5                                    | <i>Achromobacter xylosoxidans</i>    | 2.243          | A                             |
| 463         | <i>Achromobacter xylosoxidans</i>             | S                                       | 16S                             | 5                                    | <i>Achromobacter xylosoxidans</i>    | 2.315          | A                             |
| 243         | <i>Achromobacter xylosoxidans / insolitus</i> | S-sc                                    | 16S                             | 5   1                                | <i>Achromobacter insolitus</i>       | 2.175          | A                             |
| 686         | <i>Acidovorax temperans</i>                   | S                                       | 16S                             | 2                                    | <i>Acidovorax temperans</i>          | 2.393          | A                             |
| 206         | <i>Acinetobacter baumannii</i>                | S                                       | 16S                             | 7                                    | <i>Acinetobacter baumannii</i>       | 2.273          | A                             |
| 288         | <i>Acinetobacter baumannii</i>                | S                                       | 16S                             | 7                                    | <i>Acinetobacter baumannii</i>       | 2.296          | A                             |
| 656         | <i>Acinetobacter junii</i>                    | S                                       | 16S                             | 3                                    | <i>Acinetobacter junii</i>           | 2.47           | B                             |
| 29          | <i>Acinetobacter lwoffii</i>                  | S                                       | Phoenix                         | 7                                    | <i>Acinetobacter lwoffii</i>         | 2.092          | A                             |
| 103         | <i>Acinetobacter lwoffii</i>                  | S                                       | 16S                             | 7                                    | <i>Acinetobacter lwoffii</i>         | 2.432          | A                             |
| 459         | <i>Acinetobacter lwoffii</i>                  | S                                       | 16S                             | 7                                    | <i>Acinetobacter lwoffii</i>         | 2.118          | A                             |
| 668         | <i>Acinetobacter radioresistens</i>           | S                                       | 16S                             | 3                                    | <i>Acinetobacter radioresistens</i>  | 2.195          | A                             |
| 690         | <i>Acinetobacter schindleri</i>               | S                                       | 16S                             | 1                                    | <i>Acinetobacter schindleri</i>      | 2.088          | A                             |
| 255         | <i>Acinetobacter septicus / ursingii</i>      | S-sc                                    | 16S                             | Not in DB   1                        | <i>Acinetobacter ursingii</i>        | 2.030          | A                             |
| 321         | <i>Acinetobacter septicus / ursingii</i>      | S-sc                                    | 16S                             | Not in DB   1                        | <i>Acinetobacter ursingii</i>        | 2.119          | A                             |
| 435         | <i>Acinetobacter septicus / ursingii</i>      | S-sc                                    | 16S                             | Not in DB   1                        | <i>Acinetobacter ursingii</i>        | 2.397          | A                             |
| 30          | <i>Acinetobacter sp.</i>                      | G                                       | Phoenix                         | Not applicable                       | <i>Acinetobacter baumannii</i>       | 2.398          | A                             |
| 371         | <i>Acinetobacter sp.</i>                      | G                                       | Phoenix                         | Not applicable                       | <i>Acinetobacter genomospecies_3</i> | 2.036          | A                             |
| 501         | <i>Acinetobacter sp.</i>                      | G                                       | Phoenix                         | Not applicable                       | <i>Acinetobacter baumannii</i>       | 2.196          | A                             |
| 511         | <i>Acinetobacter sp.</i>                      | G                                       | Phoenix                         | Not applicable                       | <i>Acinetobacter baumannii</i>       | 2.360          | A                             |
| 520         | <i>Acinetobacter sp.</i>                      | G                                       | Phoenix                         | Not applicable                       | <i>Acinetobacter genomospecies_3</i> | 2.153          | A                             |
| 470         | <i>Actinomadura formosensis</i>               | S (Not in DB)                           | 16S                             | Not in DB                            | <i>Clostridium tetani</i>            | 1.406          | C                             |
| 1013        | <i>Actinomyces europaeus</i>                  | S                                       | 16S                             | 3                                    | <i>Actinomyces europaeus</i>         | 2.285          | A                             |
| 1056        | <i>Actinomyces funkei</i>                     | S                                       | 16S                             | 1                                    | <i>Actinomyces funkei</i>            | 2.005          | A                             |
| 232         | <i>Actinomyces graevenitzi</i>                | S                                       | 16S                             | 1                                    | <i>Actinomyces sp</i>                | 1.894          | B                             |
| 93          | <i>Actinomyces meyeri</i>                     | S                                       | 16S                             | 2                                    | <i>Actinomyces meyeri</i>            | 2.059          | A                             |
| 67          | <i>Actinomyces neuui</i>                      | S                                       | 16S                             | 5                                    | <i>Actinomyces neuui</i>             | 2.149          | A                             |
| 453         | <i>Actinomyces neuui</i>                      | S                                       | 16S                             | 5                                    | <i>Actinomyces neuui</i>             | 2.189          | A                             |
| 687         | <i>Actinomyces odontolyticus</i>              | S                                       | 16S                             | 3                                    | <i>Actinomyces odontolyticus</i>     | 2.137          | A                             |
| 237         | <i>Actinomyces sp.</i>                        | G                                       | 16S                             | Not applicable                       | <i>Acinetobacter calcoaceticus</i>   | 1.499          | C                             |
| 244         | <i>Actinomyces sp.</i>                        | G                                       | 16S                             | Not applicable                       | <i>Actinomyces sp</i>                | 1.827          | B                             |
| 245         | <i>Actinomyces sp.</i>                        | G                                       | 16S                             | Not applicable                       | <i>Actinomyces odontolyticus</i>     | 1.842          | B                             |
| 285         | <i>Actinomyces sp.</i>                        | G                                       | 16S                             | Not applicable                       | <i>Actinomyces sp</i>                | 1.980          | A                             |
| 308         | <i>Actinomyces sp.</i>                        | G                                       | 16S                             | Not applicable                       | <i>Actinomyces odontolyticus</i>     | 1.650          | C                             |

|     |                                              |   |                   |                |                                              |       |   |
|-----|----------------------------------------------|---|-------------------|----------------|----------------------------------------------|-------|---|
| 430 | <i>Actinomyces sp.</i>                       | G | 16S               | Not applicable | <i>Agromyces italicus</i>                    | 1.259 | C |
| 465 | <i>Actinomyces sp.</i>                       | G | 16S               | Not applicable | <i>Actinomyces sp</i>                        | 1.969 | A |
| 476 | <i>Actinomyces sp.</i>                       | G | 16S               | Not applicable | <i>Actinomyces radingae</i>                  | 1.852 | B |
| 710 | <i>Actinomyces turicensis</i>                | S | 16S               | 2              | <i>Actinomyces turicensis</i>                | 2.187 | A |
| 81  | <i>Aerococcus sanguinicola</i>               | S | 16S               | 3              | <i>Aerococcus sanguinicola</i>               | 1.998 | A |
| 138 | <i>Aerococcus sanguinicola</i>               | S | 16S               | 3              | <i>Aerococcus sanguinicola</i>               | 2.039 | A |
| 56  | <i>Aerococcus urinae</i>                     | S | 16S               | 6              | <i>Aerococcus urinae</i>                     | 2.173 | A |
| 190 | <i>Aerococcus urinae</i>                     | S | 16S               | 6              | <i>Aerococcus urinae</i>                     | 2.148 | A |
| 643 | <i>Aerococcus viridans</i>                   | S | QC or type strain | 6              | <i>Aerococcus viridans</i>                   | 2.328 | A |
| 115 | <i>Aeromonas hydrophila</i>                  | S | Phoenix           | 4              | <i>Aeromonas hydrophila</i>                  | 2.381 | B |
| 34  | <i>Aeromonas hydrophila</i> <sup>5</sup>     | S | Phoenix           | 4              | <i>Aeromonas hydrophila</i>                  | 2.021 | B |
| 611 | <i>Aeromonas veronii</i> <sup>6</sup>        | S | 16S, Phoenix      | 7              | <i>Aeromonas veronii</i>                     | 2.236 | B |
| 619 | <i>Aggregatibacter actinomycetemcomitans</i> | S | 16S               | 5              | <i>Aggregatibacter actinomycetemcomitans</i> | 2.214 | C |
| 620 | <i>Aggregatibacter actinomycetemcomitans</i> | S | 16S               | 5              | <i>Aggregatibacter actinomycetemcomitans</i> | 2.127 | A |
| 434 | <i>Aggregatibacter aphrophilus</i>           | S | 16S               | 3              | <i>Aggregatibacter aphrophilus</i>           | 1.986 | A |
| 635 | <i>Aggregatibacter aphrophilus</i>           | S | 16S               | 3              | <i>Aggregatibacter aphrophilus</i>           | 2.177 | C |
| 266 | <i>Aggregatibacter segnis</i>                | S | 16S               | 1              | <i>Aggregatibacter segnis</i>                | 1.627 | C |
| 300 | <i>Aggregatibacter segnis</i>                | S | 16S               | 1              | <i>Haemophilus parahaemolyticus</i>          | 1.640 | C |
| 700 | <i>Agromyces mediolanus</i>                  | S | 16S               | 3              | <i>Agromyces mediolanus</i>                  | 2.494 | A |
| 60  | <i>Alcaligenes faecalis</i>                  | S | 16S               | 10             | <i>Alcaligenes faecalis</i>                  | 2.439 | A |
| 506 | <i>Alcaligenes faecalis</i>                  | S | Phoenix           | 10             | <i>Alcaligenes faecalis</i>                  | 2.188 | A |
| 598 | <i>Alistipes finegoldii</i>                  | S | 16S               | 1              | <i>Alistipes finegoldii</i>                  | 2.427 | A |
| 697 | <i>Alloscardovia omnicolens</i>              | S | 16S               | 1              | <i>Alloscardovia omnicolens</i>              | 2.098 | A |
| 545 | <i>Arcanobacterium bernardiae</i>            | S | 16S               | 3              | <i>Arcanobacterium bernardiae</i>            | 2.158 | A |
| 151 | <i>Arcanobacterium haemolyticum</i>          | S | 16S               | 3              | <i>Arcanobacterium haemolyticum</i>          | 2.186 | A |
| 167 | <i>Arcanobacterium haemolyticum</i>          | S | 16S               | 3              | <i>Arcanobacterium haemolyticum</i>          | 2.228 | A |
| 676 | <i>Arcobacter butzleri</i>                   | S | 16S               | 4              | <i>Arcobacter butzleri</i>                   | 2.293 | A |
| 251 | <i>Arthrobacter sp.</i>                      | G | 16S               | Not applicable | <i>Staphylococcus lutrae</i>                 | 1.373 | C |
| 672 | <i>Bacillus cereus</i>                       | S | Phenotypic        | 3              | <i>Bacillus cereus</i>                       | 2.564 | A |
| 275 | <i>Bacillus sp.</i>                          | G | Phenotypic        | Not applicable | <i>Bacillus circulans</i>                    | 1.663 | C |
| 467 | <i>Bacillus sp.</i>                          | G | Phenotypic        | Not applicable | <i>Bacillus megaterium</i>                   | 1.729 | B |
| 575 | <i>Bacillus sp.</i>                          | G | 16S               | Not applicable | <i>Staphylococcus aureus</i>                 | 1.327 | C |
| 590 | <i>Bacillus sp.</i>                          | G | Phenotypic        | Not applicable | <i>Lysinibacillus fusiformis</i>             | 1.699 | C |
| 591 | <i>Bacillus sp.</i>                          | G | Phenotypic        | Not applicable | <i>Burkholderia multivorans</i>              | 1.446 | C |
| 592 | <i>Bacillus sp.</i>                          | G | Phenotypic        | Not applicable | <i>Lysinibacillus fusiformis</i>             | 2.302 | A |
| 594 | <i>Bacillus sp.</i>                          | G | Phenotypic        | Not applicable | <i>Bacillus subtilis</i>                     | 1.827 | B |

|      |                                      |       |                   |                |                                     |       |   |
|------|--------------------------------------|-------|-------------------|----------------|-------------------------------------|-------|---|
| 597  | <i>Bacillus sp.</i>                  | G     | Phenotypic        | Not applicable | <i>Bacillus megaterium</i>          | 2.137 | A |
| 561  | <i>Bacteroides fragilis</i>          | S     | 16S               | 9              | <i>Bacteroides fragilis</i>         | 2.426 | A |
| 1011 | <i>Bacteroides fragilis</i>          | S     | 16S               | 9              | <i>Bacteroides fragilis</i>         | 2.445 | A |
| 606  | <i>Bacteroides ovatus</i>            | S     | 16S               | 6              | <i>Bacteroides ovatus</i>           | 2.247 | A |
| 688  | <i>Bacteroides uniformis</i>         | S     | 16S               | 3              | <i>Bacteroides uniformis</i>        | 2.544 | A |
| 1025 | <i>Bacteroides vulgatus</i>          | S     | 16S               | 5              | <i>Bacteroides vulgatus</i>         | 2.202 | A |
| 1047 | <i>Bifidobacterium breve</i>         | S     | 16S               | 2              | <i>Bifidobacterium breve</i>        | 1.960 | A |
| 663  | <i>Bifidobacterium longum</i>        | S     | 16S               | 6              | <i>Bifidobacterium longum</i>       | 2.28  | A |
| 558  | <i>Bordetella bronchiseptica</i>     | S     | 16S               | 9              | <i>Bordetella bronchiseptica</i>    | 2.369 | B |
| 638  | <i>Bordetella bronchiseptica</i>     | S     | QC or type strain | 9              | <i>Bordetella bronchiseptica</i>    | 2.488 | B |
| 161  | <i>Bordetella hinzii</i>             | S     | 16S               | 4              | <i>Bordetella hinzii</i>            | 2.485 | A |
| 197  | <i>Bordetella holmesii</i>           | S     | 16S               | 3              | <i>Bordetella holmesii</i>          | 2.321 | A |
| 548  | <i>Bordetella holmesii</i>           | S     | 16S               | 3              | <i>Bordetella holmesii</i>          | 2.199 | A |
| 577  | <i>Bordetella parapertussis</i>      | S     | QC or type strain | 11             | <i>Bordetella parapertussis</i>     | 2.229 | B |
| 648  | <i>Bordetella parapertussis</i>      | S     | QC or type strain | 11             | <i>Bordetella parapertussis</i>     | 2.034 | B |
| 177  | <i>Bordetella pertussis</i>          | S     | Phenotypic        | 10             | <i>Bordetella bronchiseptica</i>    | 2.264 | B |
| 576  | <i>Bordetella pertussis</i>          | S     | QC or type strain | 10             | <i>Bordetella pertussis</i>         | 2.128 | B |
| 553  | <i>Bordetella trematum</i>           | S     | 16S               | 3              | <i>Bordetella trematum</i>          | 2.388 | A |
| 291  | <i>Brevibacterium casei</i>          | S     | 16S               | 3              | <i>Brevibacterium casei</i>         | 2.091 | A |
| 456  | <i>Brevibacterium casei</i>          | S     | 16S               | 3              | <i>Brevibacterium casei</i>         | 2.404 | A |
| 74   | <i>Brevundimonas diminuta</i>        | S     | 16S               | 3              | <i>Brevundimonas diminuta</i>       | 1.803 | B |
| 198  | <i>Brevundimonas sp.</i>             | G     | 16S               | Not applicable | <i>Brevundimonas aurantiaca</i>     | 1.614 | C |
| 669  | <i>Burkholderia caribensis</i>       | S     | 16S               | 1              | <i>Burkholderia caribensis</i>      | 2.459 | A |
| 150  | <i>Burkholderia cepacia</i>          | S     | Phoenix           | 8              | <i>Burkholderia cenocepacia</i>     | 1.995 | B |
| 645  | <i>Burkholderia cepacia</i>          | S     | QC or type strain | 8              | <i>Burkholderia cenocepacia</i>     | 2.474 | B |
| 124  | <i>Burkholderia cepacia</i> complex  | S-grp | 16S               | Not applicable | <i>Burkholderia dolosa</i>          | 2.466 | B |
| 152  | <i>Burkholderia cepacia</i> complex  | S-grp | 16S               | Not applicable | <i>Burkholderia cenocepacia</i>     | 2.189 | B |
| 202  | <i>Burkholderia cepacia</i> complex  | S-grp | 16S               | Not applicable | <i>Burkholderia multivorans</i>     | 2.323 | B |
| 552  | <i>Burkholderia cepacia</i> complex  | S-grp | 16S               | Not applicable | <i>Burkholderia multivorans</i>     | 1.621 | C |
| 567  | <i>Burkholderia cepacia</i> complex  | S-grp | 16S               | Not applicable | <i>Burkholderia cepacia</i> _ Group | 2.192 | B |
| 125  | <i>Burkholderia sp. MCR gladioli</i> | S-grp | 16S               | Not applicable | <i>Burkholderia gladioli</i>        | 2.287 | A |
| 233  | <i>Burkholderia sp. MCR gladioli</i> | S-grp | 16S               | Not applicable | <i>Burkholderia gladioli</i>        | 2.181 | B |
| 652  | <i>Butyricimonas virosa</i>          | S     | 16S               | 1              | <i>Butyricimonas virosa</i>         | 2.055 | A |
| 612  | <i>Campylobacter coli</i>            | S     | 16S               | 4              | <i>Campylobacter coli</i>           | 2.267 | A |
| 613  | <i>Campylobacter coli</i>            | S     | 16S               | 4              | <i>Campylobacter coli</i>           | 2.317 | A |
| 425  | <i>Campylobacter fetus</i>           | S     | 16S               | 8              | <i>Campylobacter fetus</i>          | 2.438 | A |

|      |                                 |               |            |                |                                    |       |   |
|------|---------------------------------|---------------|------------|----------------|------------------------------------|-------|---|
| 247  | <i>Campylobacter jejuni</i>     | S             | Phenotypic | 11             | <i>Campylobacter jejuni</i>        | 2.187 | A |
| 546  | <i>Campylobacter jejuni</i>     | S             | 16S        | 11             | <i>Campylobacter jejuni</i>        | 2.397 | A |
| 614  | <i>Campylobacter jejuni</i>     | S             | 16S        | 11             | <i>Campylobacter jejuni</i>        | 2.330 | A |
| 119  | <i>Campylobacter lari</i>       | S             | 16S        | 5              | <i>Campylobacter lari</i>          | 2.280 | A |
| 647  | <i>Campylobacter sputorum</i>   | S             | 16S        | 3              | <i>Campylobacter sputorum</i>      | 2.080 | A |
| 514  | <i>Capnocytophaga sp.</i>       | G             | 16S        | Not applicable | <i>Capnocytophaga sputigena</i>    | 2.058 | A |
| 101  | <i>Capnocytophaga sputigena</i> | S             | 16S        | 2              | <i>Capnocytophaga sputigena</i>    | 2.168 | A |
| 334  | <i>Capnocytophaga sputigena</i> | S             | 16S        | 2              | <i>Capnocytophaga sputigena</i>    | 2.298 | A |
| 563  | <i>Capnocytophaga sputigena</i> | S             | 16S        | 2              | <i>Capnocytophaga sputigena</i>    | 2.040 | A |
| 608  | <i>Capnocytophaga sputigena</i> | S             | 16S        | 2              | <i>Capnocytophaga sputigena</i>    | 2.461 | A |
| 1030 | <i>Cardiobacterium hominis</i>  | S             | 16S        | 1              | <i>Cardiobacterium hominis</i>     | 1.641 | C |
| 18   | <i>Citrobacter amalonaticus</i> | S             | Phoenix    | 2              | <i>Citrobacter amalonaticus</i>    | 1.930 | A |
| 1    | <i>Citrobacter braakii</i>      | S             | Phoenix    | 2              | <i>Citrobacter sedlakii</i>        | 2.154 | B |
| 14   | <i>Citrobacter braakii</i>      | S             | Phoenix    | 2              | <i>Citrobacter braakii</i>         | 2.269 | C |
| 15   | <i>Citrobacter braakii</i>      | S             | Phoenix    | 2              | <i>Citrobacter freundii</i>        | 2.161 | B |
| 19   | <i>Citrobacter braakii</i>      | S             | Phoenix    | 2              | <i>Citrobacter braakii</i>         | 2.252 | C |
| 17   | <i>Citrobacter freundii</i>     | S             | Phoenix    | 4              | <i>Citrobacter braakii</i>         | 2.188 | B |
| 328  | <i>Citrobacter freundii</i>     | S             | Phoenix    | 4              | <i>Citrobacter freundii</i>        | 2.451 | C |
| 349  | <i>Citrobacter freundii</i>     | S             | Phoenix    | 4              | <i>Citrobacter freundii</i>        | 2.473 | B |
| 505  | <i>Citrobacter freundii</i>     | S             | Phoenix    | 4              | <i>Citrobacter freundii</i>        | 2.468 | B |
| 522  | <i>Citrobacter freundii</i>     | S             | Phoenix    | 4              | <i>Citrobacter freundii</i>        | 2.068 | B |
| 210  | <i>Citrobacter koseri</i>       | S             | Phoenix    | 6              | <i>Citrobacter koseri</i>          | 2.487 | C |
| 294  | <i>Citrobacter koseri</i>       | S             | Phenotypic | 6              | <i>Citrobacter koseri</i>          | 2.532 | C |
| 339  | <i>Citrobacter koseri</i>       | S             | Phoenix    | 6              | <i>Citrobacter koseri</i>          | 2.621 | C |
| 345  | <i>Citrobacter koseri</i>       | S             | Phoenix    | 6              | <i>Citrobacter koseri</i>          | 2.395 | C |
| 16   | <i>Citrobacter sp.</i>          | G             | Phoenix    | Not applicable | <i>Citrobacter youngae</i>         | 1.969 | B |
| 531  | <i>Citrobacter sp.</i>          | G             | Phoenix    | Not applicable | <i>Citrobacter sedlakii</i>        | 2.212 | A |
| 521  | <i>Citrobacter werkmanii</i>    | S (Not in DB) | Phoenix    | Not in DB      | <i>Citrobacter freundii</i>        | 1.986 | B |
| 704  | <i>Clostridium aldenense</i>    | S             | 16S        | 1              | <i>Clostridium aldenense</i>       | 2.297 | A |
| 1059 | <i>Clostridium bifermentans</i> | S             | 16S        | 4              | <i>Clostridium bifermentans</i>    | 1.639 | C |
| 1061 | <i>Clostridium bifermentans</i> | S             | 16S        | 4              | <i>Clostridium bifermentans</i>    | 2.050 | A |
| 602  | <i>Clostridium bolteae</i>      | S (Not in DB) | 16S        | Not in DB      | <i>Clostridium clostridioforme</i> | 2.118 | A |
| 1022 | <i>Clostridium cadaveris</i>    | S             | 16S        | 2              | <i>Clostridium cadaveris</i>       | 2.286 | A |
| 581  | <i>Clostridium difficile</i>    | S             | 16S        | 10             | <i>Clostridium difficile</i>       | 2.485 | A |
| 599  | <i>Clostridium difficile</i>    | S             | Phenotypic | 10             | <i>Clostridium difficile</i>       | 2.382 | C |
| 1018 | <i>Clostridium difficile</i>    | S             | 16S        | 10             | <i>Clostridium difficile</i>       | 2.458 | A |
| 1015 | <i>Clostridium disporicum</i>   | S             | 16S        | 1              | <i>Clostridium disporicum</i>      | 2.232 | A |
| 1019 | <i>Clostridium glycolicum</i>   | S             | 16S        | 1              | <i>Clostridium glycolicum</i>      | 1.775 | B |
| 1020 | <i>Clostridium hathewayi</i>    | S             | 16S        | 3              | <i>Clostridium hathewayi</i>       | 2.284 | A |
| 1021 | <i>Clostridium innocuum</i>     | S             | 16S        | 5              | <i>Clostridium innocuum</i>        | 1.935 | A |

|      |                                             |      |                   |                |                                             |       |   |
|------|---------------------------------------------|------|-------------------|----------------|---------------------------------------------|-------|---|
| 618  | <i>Clostridium perfringens</i>              | S    | QC or type strain | 9              | <i>Clostridium perfringens</i>              | 2.510 | A |
| 1009 | <i>Clostridium perfringens</i>              | S    | 16S               | 9              | <i>Clostridium perfringens</i>              | 2.486 | A |
| 664  | <i>Clostridium ramosum</i>                  | S    | 16S               | 7              | <i>Clostridium ramosum</i>                  | 2.182 | A |
| 568  | <i>Clostridium septicum</i>                 | S    | 16S               | 2              | <i>Clostridium septicum</i>                 | 2.201 | A |
| 1029 | <i>Clostridium septicum</i>                 | S    | 16S               | 2              | <i>Clostridium septicum</i>                 | 2.135 | A |
| 1049 | <i>Clostridium septicum</i>                 | S    | 16S               | 2              | <i>Clostridium septicum</i>                 | 2.230 | A |
| 572  | <i>Clostridium sordellii</i>                | S    | 16S               | 2              | <i>Clostridium sordellii</i>                | 1.929 | A |
| 1007 | <i>Clostridium sordellii</i>                | S    | 16S               | 2              | <i>Clostridium sordellii</i>                | 2.128 | A |
| 1017 | <i>Clostridium sp.</i>                      | G    | 16S               | Not applicable | <i>Clostridium innocuum</i>                 | 2.014 | A |
| 1050 | <i>Clostridium sporogenes</i>               | S    | 16S               | 6              | <i>Clostridium sporogenes</i>               | 2.345 | A |
| 1028 | <i>Clostridium symbiosum</i>                | S    | 16S               | 1              | <i>Clostridium symbiosum</i>                | 2.012 | A |
| 605  | <i>Clostridium tertium</i>                  | S    | 16S               | 5              | <i>Clostridium tertium</i>                  | 2.258 | A |
| 249  | <i>Corynebacterium amycolatum / freneyi</i> | S-sc | 16S               | 6   1          | <i>Corynebacterium amycolatum</i>           | 2.113 | A |
| 324  | <i>Corynebacterium amycolatum / freneyi</i> | S-sc | 16S               | 6   1          | <i>Corynebacterium amycolatum</i>           | 2.233 | A |
| 265  | <i>Corynebacterium aurimucosum</i>          | S    | 16S               | 5              | <i>Corynebacterium minutissimum</i>         | 2.016 | B |
| 658  | <i>Corynebacterium bovis</i>                | S    | 16S               | 1              | <i>Corynebacterium bovis</i>                | 2.018 | A |
| 708  | <i>Corynebacterium coyleae</i>              | S    | 16S               | 2              | <i>Corynebacterium coyleae</i>              | 2.105 | A |
| 649  | <i>Corynebacterium diphtheriae</i>          | S    | QC or type strain | 4              | <i>Corynebacterium diphtheriae</i>          | 2.355 | A |
| 123  | <i>Corynebacterium falsenii</i>             | S    | 16S               | 1              | <i>Corynebacterium falsenii</i>             | 1.952 | A |
| 428  | <i>Corynebacterium glucuronolyticum</i>     | S    | 16S               | 4              | <i>Corynebacterium glucuronolyticum</i>     | 2.449 | A |
| 706  | <i>Corynebacterium imitans</i>              | S    | 16S               | 1              | <i>Corynebacterium imitans</i>              | 2.233 | A |
| 51   | <i>Corynebacterium jeikeium</i>             | S    | 16S               | 7              | <i>Corynebacterium jeikeium</i>             | 2.156 | A |
| 472  | <i>Corynebacterium jeikeium</i>             | S    | 16S               | 7              | <i>Corynebacterium jeikeium</i>             | 1.976 | A |
| 69   | <i>Corynebacterium pseudodiphtheriticum</i> | S    | 16S               | 1              | <i>Corynebacterium pseudodiphtheriticum</i> | 2.459 | B |
| 96   | <i>Corynebacterium pseudodiphtheriticum</i> | S    | 16S               | 1              | <i>Corynebacterium pseudodiphtheriticum</i> | 2.336 | B |
| 253  | <i>Corynebacterium pseudodiphtheriticum</i> | S    | 16S               | 4              | <i>Corynebacterium pseudodiphtheriticum</i> | 2.440 | B |
| 547  | <i>Corynebacterium pseudodiphtheriticum</i> | S    | 16S               | 4              | <i>Corynebacterium propinquum</i>           | 2.204 | A |
| 659  | <i>Corynebacterium resistens</i>            | S    | 16S               | 1              | <i>Corynebacterium resistens</i>            | 1.963 | A |
| 481  | <i>Corynebacterium sp.</i>                  | G    | 16S               | Not applicable | <i>Corynebacterium minutissimum</i>         | 2.192 | A |
| 57   | <i>Corynebacterium striatum</i>             | S    | 16S               | 7              | <i>Corynebacterium striatum</i>             | 2.363 | A |
| 98   | <i>Corynebacterium striatum</i>             | S    | 16S               | 7              | <i>Corynebacterium striatum</i>             | 2.394 | A |
| 419  | <i>Corynebacterium striatum</i>             | S    | 16S               | 7              | <i>Corynebacterium striatum</i>             | 2.412 | A |
| 423  | <i>Corynebacterium striatum</i>             | S    | 16S               | 7              | <i>Corynebacterium striatum</i>             | 2.314 | A |
| 440  | <i>Corynebacterium striatum</i>             | S    | 16S               | 7              | <i>Corynebacterium striatum</i>             | 2.404 | A |
| 542  | <i>Corynebacterium striatum</i>             | S    | 16S               | 7              | <i>Corynebacterium striatum</i>             | 2.483 | A |

|      |                                            |      |                                |                |                                           |       |   |
|------|--------------------------------------------|------|--------------------------------|----------------|-------------------------------------------|-------|---|
| 88   | <i>Corynebacterium striatum / simulans</i> | S-sc | 16S                            | 7   1          | <i>Corynebacterium striatum</i>           | 2.351 | A |
| 128  | <i>Corynebacterium striatum / simulans</i> | S-sc | 16S                            | 7   1          | <i>Corynebacterium striatum</i>           | 2.315 | A |
| 432  | <i>Corynebacterium striatum / simulans</i> | S-sc | 16S                            | 7   1          | <i>Corynebacterium striatum</i>           | 2.318 | A |
| 240  | <i>Corynebacterium tuberculostearicum</i>  | S    | 16S                            | 2              | <i>Corynebacterium tuberculostearicum</i> | 1.644 | C |
| 475  | <i>Corynebacterium urealyticum</i>         | S    | 16S                            | 7              | <i>Corynebacterium urealyticum</i>        | 2.088 | A |
| 63   | <i>Dermabacter hominis</i>                 | S    | 16S                            | 3              | <i>Dermabacter hominis</i>                | 1.938 | A |
| 139  | <i>Dermabacter hominis</i>                 | S    | 16S                            | 3              | <i>Dermabacter hominis</i>                | 1.905 | A |
| 182  | <i>Eikenella corrodens</i>                 | S    | Phenotypic                     | 2              | <i>Eikenella corrodens</i>                | 2.170 | A |
| 621  | <i>Eikenella corrodens</i>                 | S    | 16S                            | 2              | <i>Eikenella corrodens</i>                | 2.031 | A |
| 622  | <i>Eikenella corrodens</i>                 | S    | 16S                            | 2              | <i>Eikenella corrodens</i>                | 2.154 | A |
| 653  | <i>Elizabethkingia meningoseptica</i>      | S    | 16S                            | 3              | <i>Elizabethkingia meningoseptica</i>     | 2.196 | A |
| 20   | <i>Enterobacter aerogenes</i>              | S    | Phoenix                        | 3              | <i>Enterobacter aerogenes</i>             | 2.168 | A |
| 44   | <i>Enterobacter aerogenes</i>              | S    | Phoenix                        | 3              | <i>Enterobacter aerogenes</i>             | 2.317 | C |
| 269  | <i>Enterobacter aerogenes</i>              | S    | Phoenix                        | 3              | <i>Enterobacter aerogenes</i>             | 2.434 | C |
| 272  | <i>Enterobacter aerogenes</i>              | S    | Phoenix                        | 3              | <i>Enterobacter aerogenes</i>             | 2.372 | C |
| 318  | <i>Enterobacter aerogenes</i>              | S    | Phoenix                        | 3              | <i>Enterobacter aerogenes</i>             | 2.399 | C |
| 413  | <i>Enterobacter aerogenes</i>              | S    | Phenotypic                     | 3              | <i>Enterobacter aerogenes</i>             | 2.476 | C |
| 455  | <i>Enterobacter aerogenes</i>              | S    | 16S                            | 3              | <i>Enterobacter aerogenes</i>             | 2.465 | C |
| 519  | <i>Enterobacter aerogenes</i>              | S    | Phoenix                        | 3              | <i>Enterobacter aerogenes</i>             | 2.351 | A |
| 527  | <i>Enterobacter aerogenes</i>              | S    | Phoenix                        | 3              | <i>Enterobacter aerogenes</i>             | 2.515 | C |
| 66   | <i>Enterobacter asburiae</i>               | S    | Phoenix                        | 3              | <i>Enterobacter asburiae</i>              | 2.092 | B |
| 130  | <i>Enterobacter cancerogenus</i>           | S    | Phoenix                        | 1              | <i>Enterobacter cloacae</i>               | 2.234 | A |
| 211  | <i>Enterobacter cloacae</i>                | S    | Phoenix                        | 12             | <i>Enterobacter cloacae</i>               | 2.327 | B |
| 234  | <i>Enterobacter cloacae</i>                | S    | Phoenix                        | 12             | <i>Enterobacter cloacae</i>               | 2.220 | C |
| 273  | <i>Enterobacter cloacae</i>                | S    | Phoenix                        | 12             | <i>Enterobacter cloacae</i>               | 2.232 | A |
| 359  | <i>Enterobacter cloacae</i>                | S    | Phoenix                        | 12             | <i>Enterobacter cloacae</i>               | 1.902 | A |
| 400  | <i>Enterobacter cloacae</i>                | S    | Phoenix                        | 12             | <i>Enterobacter cloacae</i>               | 1.925 | A |
| 510  | <i>Enterobacter cloacae</i>                | S    | Phoenix                        | 12             | <i>Enterobacter cloacae</i>               | 2.440 | A |
| 513  | <i>Enterobacter cloacae</i>                | S    | Phoenix                        | 12             | <i>Enterobacter cloacae</i>               | 2.301 | B |
| 538  | <i>Enterobacter cloacae</i>                | S    | Phoenix                        | 12             | <i>Enterobacter cloacae</i>               | 2.247 | A |
| 1045 | <i>Enterobacter cloacae</i>                | S    | Phenotypic                     | 12             | <i>Enterobacter cloacae</i>               | 2.355 | B |
| 129  | <i>Enterobacter gergoviae</i>              | S    | Phoenix                        | 3              | <i>Enterobacter cloacae</i>               | 2.279 | C |
| 260  | <i>Enterobacter sp.</i>                    | G    | 16S,<br>Phoenix,<br>Phenotypic | Not applicable | <i>Enterobacter asburiae</i>              | 2.247 | B |
| 114  | <i>Enterococcus casseliflavus</i>          | S    | Phoenix                        | 6              | <i>Enterococcus casseliflavus</i>         | 2.178 | A |
| 461  | <i>Enterococcus casseliflavus</i>          | S    | 16S                            | 6              | <i>Enterococcus casseliflavus</i>         | 2.164 | A |
| 37   | <i>Enterococcus faecalis</i>               | S    | Phoenix                        | 8              | <i>Enterococcus faecalis</i>              | 2.491 | A |
| 142  | <i>Enterococcus faecalis</i>               | S    | Phenotypic                     | 8              | <i>Enterococcus faecalis</i>              | 2.352 | A |
| 143  | <i>Enterococcus faecalis</i>               | S    | Phenotypic                     | 8              | <i>Enterococcus faecalis</i>              | 2.515 | A |
| 144  | <i>Enterococcus faecalis</i>               | S    | Phenotypic                     | 8              | <i>Enterococcus faecalis</i>              | 1.955 | A |

|      |                              |   |                        |   |                              |       |   |
|------|------------------------------|---|------------------------|---|------------------------------|-------|---|
| 145  | <i>Enterococcus faecalis</i> | S | Phenotypic             | 8 | <i>Enterococcus faecalis</i> | 2.391 | A |
| 147  | <i>Enterococcus faecalis</i> | S | Phenotypic             | 8 | <i>Enterococcus faecalis</i> | 2.098 | A |
| 169  | <i>Enterococcus faecalis</i> | S | Phoenix                | 8 | <i>Enterococcus faecalis</i> | 2.572 | A |
| 170  | <i>Enterococcus faecalis</i> | S | Phoenix                | 8 | <i>Enterococcus faecalis</i> | 2.564 | A |
| 171  | <i>Enterococcus faecalis</i> | S | Phoenix                | 8 | <i>Enterococcus faecalis</i> | 2.516 | A |
| 173  | <i>Enterococcus faecalis</i> | S | Phoenix                | 8 | <i>Enterococcus faecalis</i> | 2.522 | A |
| 174  | <i>Enterococcus faecalis</i> | S | Phoenix                | 8 | <i>Enterococcus faecalis</i> | 2.427 | A |
| 175  | <i>Enterococcus faecalis</i> | S | Phoenix                | 8 | <i>Enterococcus faecalis</i> | 2.476 | A |
| 176  | <i>Enterococcus faecalis</i> | S | Phoenix                | 8 | <i>Enterococcus faecalis</i> | 2.446 | A |
| 188  | <i>Enterococcus faecalis</i> | S | 16S                    | 8 | <i>Enterococcus faecalis</i> | 2.535 | A |
| 207  | <i>Enterococcus faecalis</i> | S | 16S                    | 8 | <i>Enterococcus faecalis</i> | 2.225 | A |
| 301  | <i>Enterococcus faecalis</i> | S | 16S                    | 8 | <i>Enterococcus faecalis</i> | 2.517 | A |
| 302  | <i>Enterococcus faecalis</i> | S | 16S                    | 8 | <i>Enterococcus faecalis</i> | 2.548 | A |
| 304  | <i>Enterococcus faecalis</i> | S | 16S                    | 8 | <i>Enterococcus faecalis</i> | 2.384 | A |
| 306  | <i>Enterococcus faecalis</i> | S | 16S                    | 8 | <i>Enterococcus faecalis</i> | 1.965 | A |
| 307  | <i>Enterococcus faecalis</i> | S | 16S                    | 8 | <i>Enterococcus faecalis</i> | 2.532 | A |
| 314  | <i>Enterococcus faecalis</i> | S | Phenotypic             | 8 | <i>Enterococcus faecalis</i> | 2.477 | A |
| 330  | <i>Enterococcus faecalis</i> | S | Phoenix                | 8 | <i>Enterococcus faecalis</i> | 2.576 | A |
| 331  | <i>Enterococcus faecalis</i> | S | Phenotypic             | 8 | <i>Enterococcus faecalis</i> | 2.532 | A |
| 332  | <i>Enterococcus faecalis</i> | S | Phoenix                | 8 | <i>Enterococcus faecalis</i> | 2.453 | A |
| 356  | <i>Enterococcus faecalis</i> | S | Phenotypic             | 8 | <i>Enterococcus faecalis</i> | 2.609 | A |
| 358  | <i>Enterococcus faecalis</i> | S | Phenotypic             | 8 | <i>Enterococcus faecalis</i> | 2.532 | A |
| 381  | <i>Enterococcus faecalis</i> | S | Phoenix,<br>Phenotypic | 8 | <i>Enterococcus faecalis</i> | 2.536 | A |
| 397  | <i>Enterococcus faecalis</i> | S | Phoenix,<br>Phenotypic | 8 | <i>Enterococcus faecalis</i> | 2.484 | A |
| 402  | <i>Enterococcus faecalis</i> | S | Phoenix                | 8 | <i>Enterococcus faecalis</i> | 2.338 | A |
| 468  | <i>Enterococcus faecalis</i> | S | 16S                    | 8 | <i>Enterococcus faecalis</i> | 2.470 | A |
| 488  | <i>Enterococcus faecalis</i> | S | Phenotypic             | 8 | <i>Enterococcus faecalis</i> | 2.583 | A |
| 496  | <i>Enterococcus faecalis</i> | S | Phenotypic             | 8 | <i>Enterococcus faecalis</i> | 2.500 | A |
| 497  | <i>Enterococcus faecalis</i> | S | Phenotypic             | 8 | <i>Enterococcus faecalis</i> | 2.541 | A |
| 498  | <i>Enterococcus faecalis</i> | S | Phenotypic             | 8 | <i>Enterococcus faecalis</i> | 2.480 | A |
| 536  | <i>Enterococcus faecalis</i> | S | Phoenix                | 8 | <i>Enterococcus faecalis</i> | 2.514 | A |
| 1042 | <i>Enterococcus faecalis</i> | S | Phoenix,<br>Phenotypic | 8 | <i>Enterococcus faecalis</i> | 2.412 | A |
| 1067 | <i>Enterococcus faecalis</i> | S | QC or type<br>strain   | 8 | <i>Enterococcus faecalis</i> | 2.547 | A |
| 38   | <i>Enterococcus faecium</i>  | S | Phoenix                | 9 | <i>Enterococcus faecium</i>  | 2.480 | A |
| 42   | <i>Enterococcus faecium</i>  | S | Phoenix                | 9 | <i>Enterococcus faecium</i>  | 2.578 | A |
| 76   | <i>Enterococcus faecium</i>  | S | 16S                    | 9 | <i>Enterococcus faecium</i>  | 2.494 | A |
| 295  | <i>Enterococcus faecium</i>  | S | Phoenix                | 9 | <i>Enterococcus faecium</i>  | 2.483 | A |

|     |                                |   |                        |                |                                |       |   |
|-----|--------------------------------|---|------------------------|----------------|--------------------------------|-------|---|
| 373 | <i>Enterococcus faecium</i>    | S | Phoenix                | 9              | <i>Enterococcus faecium</i>    | 2.326 | A |
| 503 | <i>Enterococcus faecium</i>    | S | Phoenix                | 9              | <i>Enterococcus faecium</i>    | 2.442 | A |
| 39  | <i>Enterococcus raffinosus</i> | S | Phoenix                | 1              | <i>Enterococcus raffinosus</i> | 1.948 | A |
| 183 | <i>Enterococcus raffinosus</i> | S | 16S                    | 1              | <i>Enterococcus raffinosus</i> | 1.994 | A |
| 262 | <i>Enterococcus raffinosus</i> | S | 16S,<br>Phenotypic     | 1              | <i>Enterococcus raffinosus</i> | 2.006 | A |
| 146 | <i>Enterococcus sp.</i>        | G | Phenotypic             | Not applicable | <i>Enterococcus faecalis</i>   | 2.297 | A |
| 394 | <i>Enterococcus sp.</i> (VRE)  | G | Phenotypic             | Not applicable | <i>Enterococcus faecium</i>    | 2.357 | C |
| 21  | <i>Escherichia coli</i>        | S | Phoenix                | 11             | <i>Escherichia coli</i>        | 2.466 | A |
| 22  | <i>Escherichia coli</i>        | S | Phoenix                | 11             | <i>Escherichia coli</i>        | 2.378 | A |
| 23  | <i>Escherichia coli</i>        | S | Phoenix                | 11             | <i>Escherichia coli</i>        | 2.344 | A |
| 24  | <i>Escherichia coli</i>        | S | Phoenix                | 11             | <i>Escherichia coli</i>        | 2.352 | A |
| 25  | <i>Escherichia coli</i>        | S | Phoenix                | 11             | <i>Escherichia coli</i>        | 2.256 | A |
| 65  | <i>Escherichia coli</i>        | S | Phoenix,<br>Phenotypic | 11             | <i>Escherichia coli</i>        | 2.334 | A |
| 82  | <i>Escherichia coli</i>        | S | Phoenix                | 11             | <i>Escherichia coli</i>        | 2.451 | A |
| 208 | <i>Escherichia coli</i>        | S | Phoenix                | 11             | <i>Escherichia coli</i>        | 2.327 | A |
| 292 | <i>Escherichia coli</i>        | S | Phoenix                | 11             | <i>Escherichia coli</i>        | 2.162 | A |
| 312 | <i>Escherichia coli</i>        | S | Phenotypic             | 11             | <i>Escherichia coli</i>        | 2.220 | A |
| 313 | <i>Escherichia coli</i>        | S | Phenotypic             | 11             | <i>Escherichia coli</i>        | 2.327 | A |
| 316 | <i>Escherichia coli</i>        | S | Phenotypic             | 11             | <i>Escherichia coli</i>        | 2.157 | A |
| 317 | <i>Escherichia coli</i>        | S | Phenotypic             | 11             | <i>Escherichia coli</i>        | 2.190 | A |
| 325 | <i>Escherichia coli</i>        | S | Phenotypic             | 11             | <i>Escherichia coli</i>        | 2.378 | A |
| 327 | <i>Escherichia coli</i>        | S | Phenotypic             | 11             | <i>Escherichia coli</i>        | 2.399 | A |
| 343 | <i>Escherichia coli</i>        | S | Phenotypic             | 11             | <i>Escherichia coli</i>        | 2.413 | A |
| 344 | <i>Escherichia coli</i>        | S | Phenotypic             | 11             | <i>Escherichia coli</i>        | 2.406 | A |
| 346 | <i>Escherichia coli</i>        | S | Phenotypic             | 11             | <i>Escherichia coli</i>        | 2.108 | A |
| 351 | <i>Escherichia coli</i>        | S | Phenotypic             | 11             | <i>Escherichia coli</i>        | 2.301 | A |
| 352 | <i>Escherichia coli</i>        | S | Phenotypic             | 11             | <i>Escherichia coli</i>        | 2.313 | A |
| 357 | <i>Escherichia coli</i>        | S | Phenotypic             | 11             | <i>Escherichia coli</i>        | 2.338 | A |
| 375 | <i>Escherichia coli</i>        | S | Phenotypic             | 11             | <i>Escherichia coli</i>        | 2.036 | A |
| 376 | <i>Escherichia coli</i>        | S | Phenotypic             | 11             | <i>Escherichia coli</i>        | 2.208 | A |
| 377 | <i>Escherichia coli</i>        | S | Phenotypic             | 11             | <i>Escherichia coli</i>        | 2.253 | A |
| 379 | <i>Escherichia coli</i>        | S | Phenotypic             | 11             | <i>Escherichia coli</i>        | 2.092 | A |
| 380 | <i>Escherichia coli</i>        | S | Phenotypic             | 11             | <i>Escherichia coli</i>        | 2.157 | A |
| 382 | <i>Escherichia coli</i>        | S | Phenotypic             | 11             | <i>Escherichia coli</i>        | 2.199 | A |
| 383 | <i>Escherichia coli</i>        | S | Phenotypic             | 11             | <i>Escherichia coli</i>        | 2.036 | A |
| 386 | <i>Escherichia coli</i>        | S | Phenotypic             | 11             | <i>Escherichia coli</i>        | 2.103 | A |
| 387 | <i>Escherichia coli</i>        | S | Phenotypic             | 11             | <i>Escherichia coli</i>        | 2.007 | A |
| 401 | <i>Escherichia coli</i>        | S | Phoenix,<br>Phenotypic | 11             | <i>Escherichia coli</i>        | 2.177 | A |



|      |                                       |   |                                |                |                                       |       |   |
|------|---------------------------------------|---|--------------------------------|----------------|---------------------------------------|-------|---|
| 405  | <i>Escherichia coli</i>               | S | Phoenix,<br>Phenotypic         | 11             | <i>Escherichia coli</i>               | 2.058 | A |
| 406  | <i>Escherichia coli</i>               | S | Phoenix,<br>Phenotypic         | 11             | <i>Escherichia coli</i>               | 2.157 | A |
| 410  | <i>Escherichia coli</i>               | S | Phoenix                        | 11             | <i>Escherichia coli</i>               | 2.202 | B |
| 484  | <i>Escherichia coli</i>               | S | Phenotypic                     | 11             | <i>Escherichia coli</i>               | 2.261 | A |
| 489  | <i>Escherichia coli</i>               | S | Phenotypic                     | 11             | <i>Escherichia coli</i>               | 2.302 | A |
| 491  | <i>Escherichia coli</i>               | S | Phenotypic                     | 11             | <i>Escherichia coli</i>               | 2.218 | A |
| 515  | <i>Escherichia coli</i>               | S | 16S,<br>Phoenix,<br>Phenotypic | 11             | <i>Escherichia coli</i>               | 2.368 | A |
| 530  | <i>Escherichia coli</i>               | S | Phoenix                        | 11             | <i>Escherichia coli</i>               | 2.268 | A |
| 535  | <i>Escherichia coli</i>               | S | Phoenix                        | 11             | <i>Escherichia coli</i>               | 2.338 | A |
| 1066 | <i>Escherichia coli</i>               | S | QC or type<br>strain           | 11             | <i>Escherichia coli</i>               | 2.416 | A |
| 662  | <i>Facklamia languida</i>             | S | 16S                            | 1              | <i>Facklamia languida</i>             | 2.103 | A |
| 603  | <i>Finegoldia magna</i>               | S | 16S                            | 9              | <i>Finegoldia magna</i>               | 2.100 | A |
| 1014 | <i>Finegoldia magna</i>               | S | 16S                            | 9              | <i>Finegoldia magna</i>               | 2.095 | A |
| 97   | <i>Flavobacterium lindanitolerans</i> | S | 16S                            | 1              | <i>Flavobacterium lindanitolerans</i> | 2.403 | A |
| 1036 | <i>Fusobacterium necrophorum</i>      | S | 16S                            | 2              | <i>Fusobacterium necrophorum</i>      | 2.148 | A |
| 564  | <i>Fusobacterium nucleatum</i>        | S | 16S                            | 4              | <i>Shewanella frigidimarina</i>       | 1.466 | C |
| 600  | <i>Fusobacterium nucleatum</i>        | S | 16S                            | 4              | <i>Fusobacterium naviforme</i>        | 1.924 | A |
| 1051 | <i>Fusobacterium sp.</i>              | G | 16S                            | Not applicable | <i>Fusobacterium varium</i>           | 2.054 | A |
| 703  | <i>Gardnerella vaginalis</i>          | S | 16S                            | 5              | <i>Gardnerella vaginalis</i>          | 2.022 | A |
| 282  | <i>Gemella bergeri</i>                | S | 16S                            | 1              | <i>Gemella bergeri</i>                | 2.402 | A |
| 84   | <i>Gemella haemolysans</i>            | S | 16S                            | 1              | <i>Gemella bergeri</i>                | 1.747 | B |
| 241  | <i>Gemella haemolysans</i>            | S | 16S                            | 1              | <i>Gemella haemolysans</i>            | 1.923 | A |
| 112  | <i>Gemella sp.</i>                    | G | 16S                            | Not applicable | <i>Gemella bergeri</i>                | 2.315 | A |
| 238  | <i>Gordonia sp.</i>                   | G | 16S                            | Not applicable | <i>Gordonia aichiensis</i>            | 1.709 | B |
| 186  | <i>Gordonia terrae</i>                | S | 16S                            | 1              | <i>Gordonia rubripertincta</i>        | 1.726 | B |
| 54   | <i>Granulicatella adiacens</i>        | S | 16S                            | 2              | <i>Granulicatella adiacens</i>        | 1.955 | A |
| 257  | <i>Granulicatella adiacens</i>        | S | 16S                            | 2              | <i>Granulicatella adiacens</i>        | 2.065 | A |
| 99   | <i>Haemophilus influenzae</i>         | S | 16S                            | 10             | <i>Haemophilus influenzae</i>         | 2.274 | C |
| 137  | <i>Haemophilus influenzae</i>         | S | 16S                            | 10             | <i>Haemophilus influenzae</i>         | 2.431 | A |
| 140  | <i>Haemophilus influenzae</i>         | S | 16S                            | 10             | <i>Haemophilus influenzae</i>         | 2.441 | C |
| 283  | <i>Haemophilus influenzae</i>         | S | 16S                            | 10             | <i>Haemophilus influenzae</i>         | 2.138 | C |
| 320  | <i>Haemophilus influenzae</i>         | S | 16S,<br>Phenotypic             | 10             | <i>Haemophilus influenzae</i>         | 2.375 | A |
| 433  | <i>Haemophilus influenzae</i>         | S | 16S                            | 10             | <i>Haemophilus influenzae</i>         | 2.155 | A |
| 457  | <i>Haemophilus influenzae</i>         | S | 16S                            | 10             | <i>Haemophilus influenzae</i>         | 2.182 | A |
| 189  | <i>Haemophilus parahaemolyticus</i>   | S | 16S                            | 6              | <i>Haemophilus parahaemolyticus</i>   | 2.230 | A |

|     |                                     |   |                        |                |                                     |       |   |
|-----|-------------------------------------|---|------------------------|----------------|-------------------------------------|-------|---|
| 261 | <i>Haemophilus parahaemolyticus</i> | S | 16S,<br>Phenotypic     | 6              | <i>Haemophilus parahaemolyticus</i> | 2.315 | A |
| 104 | <i>Haemophilus parainfluenzae</i>   | S | 16S                    | 5              | <i>Haemophilus parainfluenzae</i>   | 2.208 | C |
| 134 | <i>Haemophilus parainfluenzae</i>   | S | 16S                    | 5              | <i>Haemophilus parainfluenzae</i>   | 2.070 | A |
| 259 | <i>Haemophilus parainfluenzae</i>   | S | 16S,<br>Phenotypic     | 5              | <i>Haemophilus parainfluenzae</i>   | 2.239 | A |
| 701 | <i>Haemophilus pittmaniae</i>       | S | 16S                    | 1              | <i>Haemophilus pittmaniae</i>       | 2.174 | C |
| 684 | <i>Hafnia alvei</i>                 | S | 16S                    | 7              | <i>Hafnia alvei</i>                 | 2.507 | A |
| 702 | <i>Helcococcus kunzii</i>           | S | 16S                    | 3              | <i>Helcococcus kunzii</i>           | 2.477 | A |
| 135 | <i>Inquilinus limosus</i>           | S | 16S                    | 2              | <i>Inquilinus limosus</i>           | 1.645 | C |
| 693 | <i>Kingella kingae</i>              | S | 16S                    | 4              | <i>Kingella kingae</i>              | 2.168 | A |
| 694 | <i>Kingella kingae</i>              | S | 16S                    | 4              | <i>Kingella kingae</i>              | 2.008 | A |
| 695 | <i>Kingella kingae</i>              | S | 16S                    | 4              | <i>Kingella kingae</i>              | 2.168 | A |
| 231 | <i>Kingella sp.</i>                 | G | 16S                    | Not applicable | <i>Kingella kingae</i>              | 1.436 | C |
| 41  | <i>Klebsiella oxytoca</i>           | S | Phoenix                | 4              | <i>Klebsiella oxytoca</i>           | 2.145 | C |
| 85  | <i>Klebsiella oxytoca</i>           | S | Phoenix,<br>Phenotypic | 4              | <i>Klebsiella oxytoca</i>           | 2.249 | C |
| 86  | <i>Klebsiella oxytoca</i>           | S | Phoenix,<br>Phenotypic | 4              | <i>Klebsiella oxytoca</i>           | 2.117 | C |
| 224 | <i>Klebsiella oxytoca</i>           | S | Phoenix                | 4              | <i>Klebsiella oxytoca</i>           | 2.461 | C |
| 225 | <i>Klebsiella oxytoca</i>           | S | Phoenix                | 4              | <i>Klebsiella oxytoca</i>           | 2.494 | C |
| 226 | <i>Klebsiella oxytoca</i>           | S | Phoenix                | 4              | <i>Klebsiella oxytoca</i>           | 2.353 | C |
| 227 | <i>Klebsiella oxytoca</i>           | S | Phoenix                | 4              | <i>Klebsiella oxytoca</i>           | 2.536 | C |
| 270 | <i>Klebsiella oxytoca</i>           | S | Phoenix                | 4              | <i>Klebsiella oxytoca</i>           | 2.216 | C |
| 508 | <i>Klebsiella oxytoca</i>           | S | Phoenix                | 4              | <i>Klebsiella oxytoca</i>           | 2.427 | C |
| 525 | <i>Klebsiella oxytoca</i>           | S | Phoenix                | 4              | <i>Klebsiella oxytoca</i>           | 2.348 | C |
| 541 | <i>Klebsiella oxytoca</i>           | S | Phoenix                | 4              | <i>Raoultella ornithinolytica</i>   | 2.589 | C |
| 46  | <i>Klebsiella pneumoniae</i>        | S | Phoenix                | 10             | <i>Klebsiella pneumoniae</i>        | 2.248 | B |
| 235 | <i>Klebsiella pneumoniae</i>        | S | Phoenix                | 10             | <i>Klebsiella pneumoniae</i>        | 2.193 | C |
| 236 | <i>Klebsiella pneumoniae</i>        | S | Phoenix                | 10             | <i>Klebsiella pneumoniae</i>        | 2.468 | C |
| 268 | <i>Klebsiella pneumoniae</i>        | S | Phoenix                | 10             | <i>Klebsiella pneumoniae</i>        | 2.103 | B |
| 271 | <i>Klebsiella pneumoniae</i>        | S | Phoenix                | 10             | <i>Klebsiella pneumoniae</i>        | 2.359 | A |
| 278 | <i>Klebsiella pneumoniae</i>        | S | 16S                    | 10             | <i>Klebsiella pneumoniae</i>        | 2.145 | A |
| 311 | <i>Klebsiella pneumoniae</i>        | S | Phoenix                | 10             | <i>Klebsiella pneumoniae</i>        | 2.164 | C |
| 341 | <i>Klebsiella pneumoniae</i>        | S | Phoenix                | 10             | <i>Klebsiella pneumoniae</i>        | 2.294 | C |
| 348 | <i>Klebsiella pneumoniae</i>        | S | Phoenix                | 10             | <i>Klebsiella pneumoniae</i>        | 2.195 | C |
| 353 | <i>Klebsiella pneumoniae</i>        | S | Phoenix                | 10             | <i>Klebsiella pneumoniae</i>        | 2.238 | C |
| 355 | <i>Klebsiella pneumoniae</i>        | S | Phoenix                | 10             | <i>Klebsiella pneumoniae</i>        | 2.193 | A |
| 363 | <i>Klebsiella pneumoniae</i>        | S | Phoenix                | 10             | <i>Klebsiella pneumoniae</i>        | 2.493 | C |
| 372 | <i>Klebsiella pneumoniae</i>        | S | Phoenix                | 10             | <i>Klebsiella pneumoniae</i>        | 1.914 | A |
| 404 | <i>Klebsiella pneumoniae</i>        | S | Phoenix                | 10             | <i>Klebsiella pneumoniae</i>        | 2.214 | A |

|      |                                                    |      |                      |                |                                      |       |   |
|------|----------------------------------------------------|------|----------------------|----------------|--------------------------------------|-------|---|
| 454  | <i>Klebsiella pneumoniae</i>                       | S    | Phenotypic           | 10             | <i>Klebsiella pneumoniae</i>         | 1.973 | A |
| 483  | <i>Klebsiella pneumoniae</i>                       | S    | Phenotypic           | 10             | <i>Klebsiella pneumoniae</i>         | 2.086 | C |
| 485  | <i>Klebsiella pneumoniae</i>                       | S    | Phenotypic           | 10             | <i>Klebsiella pneumoniae</i>         | 2.225 | A |
| 502  | <i>Klebsiella pneumoniae</i>                       | S    | Phoenix              | 10             | <i>Klebsiella pneumoniae</i>         | 2.328 | A |
| 504  | <i>Klebsiella pneumoniae</i>                       | S    | Phoenix              | 10             | <i>Klebsiella pneumoniae</i>         | 2.242 | C |
| 509  | <i>Klebsiella pneumoniae</i>                       | S    | Phoenix              | 10             | <i>Klebsiella pneumoniae</i>         | 2.185 | A |
| 539  | <i>Klebsiella pneumoniae</i>                       | S    | Phoenix              | 10             | <i>Klebsiella pneumoniae</i>         | 2.316 | A |
| 1033 | <i>Klebsiella pneumoniae</i>                       | S    | 16S,<br>Phenotypic   | 10             | <i>Klebsiella pneumoniae</i>         | 1.925 | A |
| 1034 | <i>Klebsiella pneumoniae</i>                       | S    | 16S,<br>Phenotypic   | 10             | <i>Klebsiella pneumoniae</i>         | 2.043 | A |
| 1044 | <i>Klebsiella pneumoniae</i>                       | S    | Phenotypic           | 10             | <i>Klebsiella pneumoniae</i>         | 2.330 | B |
| 1068 | <i>Klebsiella pneumoniae</i>                       | S    | QC or type<br>strain | 10             | <i>Klebsiella pneumoniae</i>         | 2.102 | A |
| 682  | <i>Lactobacillus brevis</i>                        | S    | 16S                  | 5              | <i>Lactobacillus brevis</i>          | 2.169 | A |
| 709  | <i>Lactobacillus delbrueckii</i>                   | S    | 16S                  | 7              | <i>Lactobacillus delbrueckii</i>     | 2.438 | A |
| 675  | <i>Lactobacillus murinus</i>                       | S    | 16S                  | 2              | <i>Lactobacillus murinus</i>         | 2.241 | A |
| 178  | <i>Lactobacillus paracasei</i>                     | S    | 16S                  | 14             | <i>Lactobacillus paracasei</i>       | 2.286 | A |
| 77   | <i>Lactobacillus rhamnosus</i>                     | S    | 16S                  | 2              | <i>Lactobacillus rhamnosus</i>       | 2.035 | A |
| 252  | <i>Lactobacillus rhamnosus</i>                     | S    | 16S                  | 2              | <i>Lactobacillus rhamnosus</i>       | 2.100 | A |
| 299  | <i>Lactobacillus rhamnosus</i>                     | S    | 16S                  | 2              | <i>Lactobacillus rhamnosus</i>       | 1.946 | A |
| 429  | <i>Lactobacillus rhamnosus</i>                     | S    | 16S                  | 2              | <i>Lactobacillus rhamnosus</i>       | 2.025 | A |
| 439  | <i>Lactobacillus rhamnosus</i>                     | S    | 16S                  | 2              | <i>Lactobacillus rhamnosus</i>       | 2.223 | A |
| 444  | <i>Lactobacillus rhamnosus</i>                     | S    | 16S                  | 2              | <i>Lactobacillus rhamnosus</i>       | 2.253 | A |
| 469  | <i>Lactobacillus sp.</i>                           | G    | Phenotypic           | Not applicable | <i>Lactobacillus delbrueckii</i>     | 1.953 | A |
| 595  | <i>Lactobacillus sp.</i>                           | G    | 16S                  | Not applicable | <i>Lactobacillus jensenii</i>        | 2.152 | A |
| 209  | <i>Lactococcus lactis</i>                          | S    | 16S                  | 8              | <i>Lactococcus lactis</i>            | 2.299 | A |
| 679  | <i>Legionella micdadei</i>                         | S    | 16S                  | 1              | <i>Legionella micdadei</i>           | 1.941 | A |
| 117  | <i>Listeria monocytogenes</i>                      | S    | 16S                  | 5              | <i>Listeria monocytogenes</i>        | 2.354 | B |
| 154  | <i>Listeria monocytogenes</i>                      | S    | 16S                  | 5              | <i>Listeria monocytogenes</i>        | 2.518 | B |
| 554  | <i>Listeria monocytogenes</i>                      | S    | 16S                  | 5              | <i>Listeria monocytogenes</i>        | 2.381 | B |
| 677  | <i>Massilia timonae</i>                            | S    | 16S                  | 3              | <i>Massilia timonae</i>              | 2.072 | A |
| 133  | <i>Methylobacterium sp.</i>                        | G    | 16S                  | Not applicable | <i>Capnocytophaga sputigena</i>      | 1.513 | C |
| 89   | <i>Microbacterium paraoxydans</i>   <i>oxydans</i> | S-sc | 16S                  | Not in DB   1  | <i>Microbacterium sp</i>             | 1.962 | A |
| 254  | <i>Microbacterium sp.</i>                          | G    | 16S                  | Not applicable | <i>Clostridium cochlearium</i>       | 1.534 | C |
| 421  | <i>Microbacterium sp.</i>                          | G    | 16S                  | Not applicable | <i>Arthrobacter crystallopoietes</i> | 1.378 | C |
| 707  | <i>Microbacterium sp.</i>                          | G    | 16S                  | Not applicable | <i>Microbacterium maritipicum</i>    | 2.198 | B |
| 118  | <i>Micrococcus sp.</i>                             | G    | Phenotypic           | Not applicable | <i>Micrococcus luteus</i>            | 2.396 | A |
| 673  | <i>Moraxella atlantae</i>                          | S    | 16S                  | 1              | <i>Moraxella atlantae</i>            | 1.94  | A |
| 83   | <i>Moraxella catarrhalis</i>                       | S    | Phenotypic           | 7              | <i>Moraxella catarrhalis</i>         | 2.477 | A |
| 53   | <i>Moraxella nonliquefaciens</i>                   | S    | 16S                  | 3              | <i>Moraxella nonliquefaciens</i>     | 1.954 | A |

|      |                                  |   |                                  |                |                                  |       |   |
|------|----------------------------------|---|----------------------------------|----------------|----------------------------------|-------|---|
| 156  | <i>Moraxella nonliquefaciens</i> | S | 16s                              | 3              | <i>Moraxella nonliquefaciens</i> | 2.216 | A |
| 192  | <i>Moraxella nonliquefaciens</i> | S | 16S                              | 3              | <i>Moraxella nonliquefaciens</i> | 2.207 | A |
| 201  | <i>Moraxella nonliquefaciens</i> | S | 16S                              | 3              | <i>Moraxella nonliquefaciens</i> | 2.430 | A |
| 286  | <i>Moraxella nonliquefaciens</i> | S | 16S                              | 3              | <i>Moraxella nonliquefaciens</i> | 2.062 | A |
| 290  | <i>Moraxella nonliquefaciens</i> | S | 16S                              | 3              | <i>Moraxella nonliquefaciens</i> | 2.264 | A |
| 466  | <i>Moraxella nonliquefaciens</i> | S | 16S                              | 3              | <i>Moraxella nonliquefaciens</i> | 2.187 | A |
| 474  | <i>Moraxella nonliquefaciens</i> | S | 16S                              | 3              | <i>Moraxella nonliquefaciens</i> | 2.075 | A |
| 126  | <i>Moraxella osloensis</i>       | S | 16S                              | 7              | <i>Moraxella osloensis</i>       | 2.012 | A |
| 185  | <i>Moraxella osloensis</i>       | S | 16S                              | 7              | <i>Moraxella osloensis</i>       | 2.086 | A |
| 95   | <i>Moraxella sp.</i>             | G | 16S                              | Not applicable | <i>Moraxella nonliquefaciens</i> | 2.059 | A |
| 2    | <i>Morganella morganii</i>       | S | Phoenix                          | 10             | <i>Morganella morganii</i>       | 2.590 | A |
| 3    | <i>Morganella morganii</i>       | S | Phoenix                          | 10             | <i>Morganella morganii</i>       | 2.409 | A |
| 168  | <i>Morganella morganii</i>       | S | 16S                              | 10             | <i>Morganella morganii</i>       | 2.662 | A |
| 213  | <i>Morganella morganii</i>       | S | Phoenix                          | 10             | <i>Morganella morganii</i>       | 2.589 | A |
| 214  | <i>Morganella morganii</i>       | S | Phoenix                          | 10             | <i>Morganella morganii</i>       | 2.578 | A |
| 414  | <i>Morganella morganii</i>       | S | Phoenix                          | 10             | <i>Morganella morganii</i>       | 2.512 | A |
| 518  | <i>Morganella morganii</i>       | S | Phoenix                          | 10             | <i>Morganella morganii</i>       | 2.464 | A |
| 92   | <i>Myroides odoratimimus</i>     | S | 16S                              | 3              | <i>Myroides odoratimimus</i>     | 2.334 | A |
| 264  | <i>Naxibacter sp.</i>            | G | 16S                              | Not applicable | <i>Aromatoleum anaerobicus</i>   | 1.362 | C |
| 705  | <i>Neisseria bacilliformis</i>   | S | 16S                              | 1              | <i>Neisseria bacilliformis</i>   | 1.878 | B |
| 106  | <i>Neisseria elongata</i>        | S | 16S                              | 2              | <i>Neisseria elongata</i>        | 1.833 | B |
| 141  | <i>Neisseria elongata</i>        | S | 16S                              | 2              | <i>Neisseria elongata</i>        | 1.348 | C |
| 478  | <i>Neisseria elongata</i>        | S | 16S                              | 2              | <i>Neisseria elongata</i>        | 1.985 | A |
| 1002 | <i>Neisseria gonorrhoeae</i>     | S | Phenotypic,<br>DNA probe         | 7              | <i>Neisseria gonorrhoeae</i>     | 2.549 | B |
| 1004 | <i>Neisseria gonorrhoeae</i>     | S | Phenotypic,<br>DNA probe         | 7              | <i>Neisseria gonorrhoeae</i>     | 2.3   | A |
| 1006 | <i>Neisseria gonorrhoeae</i>     | S | 16S,<br>Phenotypic,<br>DNA probe | 7              | <i>Neisseria gonorrhoeae</i>     | 2.344 | B |
| 1008 | <i>Neisseria gonorrhoeae</i>     | S | Phenotypic,<br>DNA probe         | 7              | <i>Neisseria gonorrhoeae</i>     | 2.438 | B |
| 1010 | <i>Neisseria gonorrhoeae</i>     | S | Phenotypic,<br>DNA probe         | 7              | <i>Neisseria gonorrhoeae</i>     | 2.411 | B |
| 639  | <i>Neisseria lactamica</i>       | S | QC or type<br>strain             | 2              | <i>Neisseria lactamica</i>       | 1.876 | B |
| 309  | <i>Neisseria meningitidis</i>    | S | 16S                              | 11             | <i>Neisseria meningitidis</i>    | 2.454 | B |
| 583  | <i>Neisseria meningitidis</i>    | S | QC or type<br>strain             | 11             | <i>Neisseria meningitidis</i>    | 2.284 | A |
| 1016 | <i>Neisseria meningitidis</i>    | S | 16S                              | 11             | <i>Neisseria meningitidis</i>    | 2.505 | A |
| 1027 | <i>Neisseria meningitidis</i>    | S | 16S                              | 11             | <i>Neisseria meningitidis</i>    | 2.281 | A |

|      |                                            |               |              |                |                                            |       |   |
|------|--------------------------------------------|---------------|--------------|----------------|--------------------------------------------|-------|---|
| 1039 | <i>Neisseria meningitidis</i>              | S             | ID by client | 11             | <i>Neisseria meningitidis</i>              | 2.410 | A |
| 1052 | <i>Neisseria meningitidis</i>              | S             | ID by client | 11             | <i>Neisseria meningitidis</i>              | 2.430 | A |
| 1057 | <i>Neisseria meningitidis</i>              | S             | 16S          | 11             | <i>Neisseria meningitidis</i>              | 2.450 | A |
| 1058 | <i>Neisseria meningitidis</i>              | S             | ID by client | 11             | <i>Neisseria meningitidis</i>              | 2.454 | A |
| 1060 | <i>Neisseria meningitidis</i>              | S             | 16S          | 11             | <i>Neisseria meningitidis</i>              | 2.388 | A |
| 1062 | <i>Neisseria meningitidis</i>              | S             | 16S          | 11             | <i>Neisseria meningitidis</i>              | 2.476 | A |
| 1064 | <i>Neisseria meningitidis</i>              | S             | 16S          | 11             | <i>Neisseria meningitidis</i>              | 2.508 | B |
| 102  | <i>Neisseria sp.</i>                       | G             | 16S          | Not applicable | <i>Neisseria meningitidis</i>              | 1.695 | C |
| 258  | <i>Neisseria sp.</i>                       | G             | 16S          | Not applicable | <i>Neisseria sicca</i>                     | 1.460 | C |
| 464  | <i>Neisseria sp.</i>                       | G             | 16S          | Not applicable | <i>Neisseria cinerea</i>                   | 1.997 | A |
| 471  | <i>Neisseria sp.</i>                       | G             | 16S          | Not applicable | <i>Neisseria meningitidis</i>              | 1.590 | C |
| 105  | <i>Neisseria weaveri</i>                   | S             | 16S          | 1              | <i>Neisseria weaveri</i>                   | 2.018 | A |
| 559  | <i>Neisseria weaveri</i>                   | S             | 16S          | 1              | <i>Neisseria weaveri</i>                   | 1.987 | A |
| 62   | <i>Nocardia abscessus</i> complex          | S-grp         | 16S          | Not applicable | <i>Nocardia sp</i>                         | 1.631 | C |
| 205  | <i>Nocardia abscessus</i> complex          | S-grp         | 16S          | Not applicable | <i>Lactobacillus amylolyticus</i>          | 1.327 | C |
| 451  | <i>Nocardia brasiliensis</i>               | S (Not in DB) | 16S          | Not in DB      | <i>Nocardia sp</i>                         | 1.778 | B |
| 230  | <i>Nocardia cyriacigeorgica</i> complex    | S-grp         | 16S          | Not applicable | <i>Nocardia species</i>                    | 1.561 | C |
| 487  | <i>Nocardia cyriacigeorgica</i> complex    | S-grp         | 16S          | Not applicable | <i>Staphylococcus sciuri ssp rodentium</i> | 1.353 | C |
| 58   | <i>Nocardia farcinica</i>                  | S             | 16S          | 1              | <i>Nocardia sp</i>                         | 1.477 | C |
| 70   | <i>Nocardia farcinica</i>                  | S             | 16S          | 1              | <i>Nocardia sp</i>                         | 1.631 | C |
| 72   | <i>Nocardia nova</i>                       | S             | 16S          | 2              | <i>Nocardia nova</i>                       | 2.331 | A |
| 78   | <i>Ochrobactrum anthropi   intermedium</i> | S-sc          | 16S          | 2   1          | <i>Ochrobactrum intermedium</i>            | 2.623 | A |
| 55   | <i>Oligella urethralis</i>                 | S             | 16S          | 2              | <i>Oligella urethralis</i>                 | 2.024 | A |
| 155  | <i>Oligella urethralis</i>                 | S             | 16S          | 2              | <i>Oligella urethralis</i>                 | 2.213 | A |
| 165  | <i>Paenibacillus sp.</i>                   | G             | 16S          | Not applicable | <i>Stenotrophomonas maltophilia</i>        | 1.426 | C |
| 596  | <i>Paenibacillus sp.</i>                   | G             | 16S          | Not applicable | <i>Paenibacillus pabuli</i>                | 1.718 | B |
| 191  | <i>Paracoccus yeei</i>                     | S             | 16S          | 4              | <i>Paracoccus yeei</i>                     | 2.156 | A |
| 438  | <i>Paracoccus yeei</i>                     | S             | 16S          | 4              | <i>Paracoccus yeei</i>                     | 2.011 | A |
| 573  | <i>Paracoccus yeei</i>                     | S             | 16S          | 4              | <i>Methylobacterium organophilum</i>       | 1.689 | C |
| 1012 | <i>Parvimonas micra</i>                    | S             | 16S          | 2              | <i>Parvimonas micra</i>                    | 2.203 | A |
| 1053 | <i>Parvimonas micra</i>                    | S             | 16S          | 2              | <i>Parvimonas micra</i>                    | 2.347 | A |
| 1055 | <i>Parvimonas micra</i>                    | S             | 16S          | 2              | <i>Parvimonas micra</i>                    | 1.366 | C |
| 90   | <i>Pasteurella canis</i>                   | S             | 16S          | 3              | <i>Pasteurella canis</i>                   | 2.385 | C |
| 443  | <i>Pasteurella canis</i>                   | S             | 16S          | 3              | <i>Pasteurella canis</i>                   | 2.116 | A |
| 477  | <i>Pasteurella canis</i>                   | S             | 16S          | 3              | <i>Pasteurella canis</i>                   | 2.079 | A |
| 127  | <i>Pasteurella dagmatis</i>                | S             | 16S          | 1              | <i>Pasteurella dagmatis</i>                | 2.309 | A |
| 160  | <i>Pasteurella dagmatis</i>                | S             | 16S          | 1              | <i>Pasteurella dagmatis</i>                | 2.412 | C |
| 187  | <i>Pasteurella multocida</i>               | S             | 16S          | 10             | <i>Pasteurella multocida</i>               | 2.370 | A |
| 181  | <i>Pasteurella sp.</i>                     | G             | 16S          | Not applicable | <i>Pasteurella canis</i>                   | 1.741 | B |
| 163  | <i>Pediococcus acidilactici</i>            | S             | 16S          | 4              | <i>Pediococcus acidilactici</i>            | 2.456 | A |
| 1046 | <i>Peptoniphilus gorbachii</i>             | S (Not in DB) | 16S          | Not in DB      | <i>Pseudomonas trivialis</i>               | 1.325 | C |

|      |                                          |               |              |                |                                      |       |   |
|------|------------------------------------------|---------------|--------------|----------------|--------------------------------------|-------|---|
| 1032 | <i>Peptoniphilus sp.</i>                 | G             | 16S          | Not applicable | <i>Peptoniphilus harei</i>           | 2.215 | A |
| 1054 | <i>Peptoniphilus sp.</i>                 | G             | 16S          | Not applicable | <i>Peptoniphilus harei</i>           | 2.425 | A |
| 1003 | <i>Peptostreptococcus anaerobius</i>     | S             | 16S          | 4              | <i>Peptostreptococcus anaerobius</i> | 2.268 | A |
| 692  | <i>Plesiomonas shigelloides</i>          | S             | Phoenix      | 5              | <i>Plesiomonas shigelloides</i>      | 2.123 | A |
| 1026 | <i>Prevotella amnii</i>                  | S (Not in DB) | 16S          | Not in DB      | <i>Acinetobacter parvus</i>          | 1.412 | C |
| 604  | <i>Prevotella bivia</i>                  | S             | 16S          | 7              | <i>Prevotella bivia</i>              | 2.339 | A |
| 1005 | <i>Prevotella buccalis</i>               | S             | 16S          | 1              | <i>Prevotella buccalis</i>           | 1.896 | B |
| 1048 | <i>Prevotella disiens</i>                | S             | 16S          | 3              | <i>Prevotella disiens</i>            | 2.164 | A |
| 1001 | <i>Prevotella melaninogenica</i>         | S             | 16S          | 2              | <i>Prevotella melaninogenica</i>     | 1.956 | A |
| 665  | <i>Prevotella oris</i>                   | S             | 16S          | 1              | <i>Prevotella oris</i>               | 2.394 | A |
| 75   | <i>Propionibacterium acnes</i>           | S             | Phenotypic   | 9              | <i>Propionibacterium acnes</i>       | 2.285 | A |
| 279  | <i>Propionibacterium acnes</i>           | S             | Phenotypic   | 9              | <i>Propionibacterium acnes</i>       | 2.256 | A |
| 323  | <i>Propionibacterium acnes</i>           | S             | 16S          | 9              | <i>Propionibacterium acnes</i>       | 2.044 | A |
| 601  | <i>Propionibacterium acnes</i>           | S             | 16S          | 9              | <i>Propionibacterium acnes</i>       | 2.221 | A |
| 607  | <i>Propionibacterium acnes</i>           | S             | ID by client | 9              | <i>Propionibacterium acnes</i>       | 1.927 | A |
| 1063 | <i>Propionibacterium acnes</i>           | S             | 16S          | 9              | <i>Propionibacterium acnes</i>       | 1.597 | C |
| 666  | <i>Propionibacterium granulosum</i>      | S             | 16S          | 4              | <i>Propionibacterium granulosum</i>  | 2.377 | A |
| 9    | <i>Proteus mirabilis</i>                 | S             | Phoenix      | 9              | <i>Proteus mirabilis</i>             | 2.399 | A |
| 10   | <i>Proteus mirabilis</i>                 | S             | Phoenix      | 9              | <i>Proteus mirabilis</i>             | 2.332 | A |
| 11   | <i>Proteus mirabilis</i>                 | S             | Phoenix      | 9              | <i>Proteus mirabilis</i>             | 2.364 | A |
| 12   | <i>Proteus mirabilis</i>                 | S             | Phoenix      | 9              | <i>Proteus mirabilis</i>             | 2.466 | A |
| 13   | <i>Proteus mirabilis</i>                 | S             | Phoenix      | 9              | <i>Proteus mirabilis</i>             | 2.455 | A |
| 215  | <i>Proteus mirabilis</i>                 | S             | Phoenix      | 9              | <i>Proteus mirabilis</i>             | 2.546 | A |
| 216  | <i>Proteus mirabilis</i>                 | S             | Phoenix      | 9              | <i>Proteus mirabilis</i>             | 2.515 | A |
| 217  | <i>Proteus mirabilis</i>                 | S             | Phoenix      | 9              | <i>Proteus mirabilis</i>             | 2.569 | A |
| 218  | <i>Proteus mirabilis</i>                 | S             | Phoenix      | 9              | <i>Proteus mirabilis</i>             | 2.501 | A |
| 219  | <i>Proteus mirabilis</i>                 | S             | Phoenix      | 9              | <i>Proteus mirabilis</i>             | 2.568 | A |
| 220  | <i>Proteus mirabilis</i>                 | S             | Phoenix      | 9              | <i>Proteus mirabilis</i>             | 2.551 | A |
| 221  | <i>Proteus mirabilis</i>                 | S             | Phoenix      | 9              | <i>Proteus mirabilis</i>             | 2.516 | A |
| 337  | <i>Proteus mirabilis</i>                 | S             | Phoenix      | 9              | <i>Proteus mirabilis</i>             | 2.604 | A |
| 388  | <i>Proteus mirabilis</i>                 | S             | Phoenix      | 9              | <i>Proteus mirabilis</i>             | 2.119 | A |
| 512  | <i>Proteus mirabilis</i>                 | S             | Phoenix      | 9              | <i>Proteus mirabilis</i>             | 2.327 | A |
| 529  | <i>Proteus mirabilis</i>                 | S             | Phoenix      | 9              | <i>Proteus mirabilis</i>             | 2.391 | A |
| 537  | <i>Proteus mirabilis</i>                 | S             | Phoenix      | 9              | <i>Proteus mirabilis</i>             | 2.530 | A |
| 1035 | <i>Proteus mirabilis</i>                 | S             | 16S          | 9              | <i>Proteus mirabilis</i>             | 2.296 | A |
| 523  | <i>Proteus vulgaris</i>                  | S             | Phoenix      | 7              | <i>Proteus vulgaris</i>              | 2.436 | B |
| 507  | <i>Providencia rettgeri</i>              | S             | Phoenix      | 8              | <i>Providencia rettgeri</i>          | 2.113 | C |
| 6    | <i>Providencia stuartii</i>              | S             | Phoenix      | 2              | <i>Providencia stuartii</i>          | 2.269 | A |
| 212  | <i>Providencia stuartii</i>              | S             | Phoenix      | 2              | <i>Providencia stuartii</i>          | 2.265 | A |
| 5    | <i>Providencia stuartii</i> <sup>4</sup> | S             | 16S, Phoenix | 2              | <i>Providencia stuartii</i>          | 2.185 | A |

|      |                                          |       |                        |                |                                       |       |   |
|------|------------------------------------------|-------|------------------------|----------------|---------------------------------------|-------|---|
| 26   | <i>Pseudomonas aeruginosa</i>            | S     | Phoenix                | 6              | <i>Pseudomonas aeruginosa</i>         | 2.477 | A |
| 27   | <i>Pseudomonas aeruginosa</i>            | S     | Phoenix                | 6              | <i>Pseudomonas aeruginosa</i>         | 2.306 | A |
| 28   | <i>Pseudomonas aeruginosa</i>            | S     | Phoenix                | 6              | <i>Pseudomonas aeruginosa</i>         | 2.185 | A |
| 195  | <i>Pseudomonas aeruginosa</i>            | S     | 16S                    | 6              | <i>Pseudomonas aeruginosa</i>         | 2.355 | A |
| 204  | <i>Pseudomonas aeruginosa</i>            | S     | 16S                    | 6              | <i>Pseudomonas aeruginosa</i>         | 1.949 | A |
| 298  | <i>Pseudomonas aeruginosa</i>            | S     | 16S                    | 6              | <i>Pseudomonas aeruginosa</i>         | 2.502 | A |
| 329  | <i>Pseudomonas aeruginosa</i>            | S     | Phenotypic             | 6              | <i>Pseudomonas aeruginosa</i>         | 2.391 | A |
| 335  | <i>Pseudomonas aeruginosa</i>            | S     | Phoenix                | 6              | <i>Pseudomonas aeruginosa</i>         | 2.339 | A |
| 336  | <i>Pseudomonas aeruginosa</i>            | S     | Phenotypic             | 6              | <i>Pseudomonas aeruginosa</i>         | 2.358 | A |
| 384  | <i>Pseudomonas aeruginosa</i>            | S     | Phenotypic             | 6              | <i>Pseudomonas aeruginosa</i>         | 2.018 | A |
| 409  | <i>Pseudomonas aeruginosa</i>            | S     | Phoenix                | 6              | <i>Pseudomonas aeruginosa</i>         | 2.461 | A |
| 499  | <i>Pseudomonas aeruginosa</i>            | S     | Phenotypic             | 6              | <i>Pseudomonas aeruginosa</i>         | 2.465 | A |
| 500  | <i>Pseudomonas aeruginosa</i>            | S     | Phenotypic             | 6              | <i>Pseudomonas aeruginosa</i>         | 2.432 | A |
| 534  | <i>Pseudomonas aeruginosa</i>            | S     | Phenotypic             | 6              | <i>Pseudomonas aeruginosa</i>         | 2.436 | A |
| 551  | <i>Pseudomonas aeruginosa</i>            | S     | 16S                    | 6              | <i>Pseudomonas aeruginosa</i>         | 1.978 | A |
| 1041 | <i>Pseudomonas aeruginosa</i>            | S     | Phoenix,<br>Phenotypic | 6              | <i>Pseudomonas aeruginosa</i>         | 2.395 | A |
| 1069 | <i>Pseudomonas aeruginosa</i>            | S     | QC or type<br>strain   | 6              | <i>Pseudomonas aeruginosa</i>         | 2.405 | A |
| 303  | <i>Pseudomonas aeruginosa</i> Group      | S-grp | 16S                    | Not applicable | <i>Pseudomonas mendocina</i>          | 1.986 | B |
| 305  | <i>Pseudomonas aeruginosa</i> Group      | S-grp | 16S                    | Not applicable | <i>Pseudomonas mendocina</i>          | 2.091 | B |
| 549  | <i>Pseudomonas citronellolis</i>         | S     | 16S                    | 2              | <i>Pseudomonas citronellolis</i>      | 2.205 | A |
| 674  | <i>Pseudomonas luteola</i>               | S     | 16S                    | 3              | <i>Pseudomonas luteola</i>            | 2.324 | A |
| 389  | <i>Pseudomonas sp. fluorescent</i> Group | S-grp | Phenotypic             | Not applicable | <i>Pseudomonas monteilii</i>          | 2.069 | A |
| 1065 | <i>Pseudomonas stutzeri</i>              | S     | QC or type<br>strain   | 6              | <i>Pseudomonas stutzeri</i>           | 2.384 | A |
| 100  | <i>Ralstonia insidiosa</i>               | S     | 16S                    | 3              | <i>Ralstonia insidiosa</i>            | 1.968 | A |
| 657  | <i>Ralstonia mannitolilytica</i>         | S     | 16S                    | 1              | <i>Ralstonia mannitolilytica</i>      | 1.874 | B |
| 680  | <i>Ralstonia pickettii</i>               | S     | 16S                    | 1              | <i>Ralstonia pickettii</i>            | 2.363 | A |
| 43   | <i>Rhizobium radiobacter</i>             | S     | 16S                    | 5              | <i>Rhizobium radiobacter</i>          | 2.303 | C |
| 199  | <i>Rhizobium radiobacter</i>             | S     | 16S                    | 5              | <i>Rhizobium radiobacter</i>          | 2.360 | C |
| 571  | <i>Rhodococcus corynebacterioides</i>    | S     | 16S                    | 1              | <i>Rhodococcus corynebacterioides</i> | 1.591 | C |
| 637  | <i>Rhodococcus equi</i>                  | S     | 16S                    | 8              | <i>Rhodococcus equi</i>               | 2.279 | A |
| 616  | <i>Rhodococcus erythropolis</i>          | S     | 16S                    | 16             | <i>Rhodococcus erythropolis</i>       | 1.828 | B |
| 179  | <i>Rhodococcus ruber</i>                 | S     | 16S                    | 15             | <i>Rhodococcus ruber</i>              | 2.132 | A |
| 52   | <i>Roseomonas mucosa</i>                 | S     | 16S                    | 1              | <i>Roseomonas mucosa</i>              | 2.103 | A |
| 203  | <i>Rothia aeria</i>                      | S     | 16S                    | 1              | <i>Rothia aeria</i>                   | 2.132 | A |
| 113  | <i>Rothia dentocariosa</i>               | S     | 16S                    | 5              | <i>Rothia dentocariosa</i>            | 2.372 | A |
| 229  | <i>Rothia dentocariosa</i>               | S     | 16S                    | 5              | <i>Rothia dentocariosa</i>            | 2.218 | A |
| 636  | <i>Rothia dentocariosa</i>               | S     | 16S                    | 5              | <i>Rothia dentocariosa</i>            | 2.137 | A |
| 437  | <i>Rothia mucilaginoso</i>               | S     | 16S                    | 3              | <i>Rothia mucilaginoso</i>            | 1.970 | A |

|     |                                             |               |                        |                |                                   |       |   |
|-----|---------------------------------------------|---------------|------------------------|----------------|-----------------------------------|-------|---|
| 582 | <i>Salmonella enterica</i> (serotype typhi) | S             | Phoenix                | 16             | <i>Salmonella sp (enterica)</i>   | 2.043 | A |
| 107 | <i>Salmonella sp.</i>                       | G             | 16S                    | Not applicable | <i>Salmonella sp</i>              | 2.398 | C |
| 449 | <i>Salmonella sp.</i>                       | G             | 16S                    | Not applicable | <i>Salmonella sp</i>              | 2.007 | A |
| 579 | <i>Salmonella sp.</i>                       | G             | 16S, Phoenix           | Not applicable | <i>Salmonella sp</i>              | 2.326 | A |
| 7   | <i>Serratia marcescens</i>                  | S             | Phoenix                | 8              | <i>Serratia marcescens</i>        | 2.301 | B |
| 8   | <i>Serratia marcescens</i>                  | S             | Phoenix                | 8              | <i>Serratia marcescens</i>        | 2.244 | B |
| 116 | <i>Serratia marcescens</i>                  | S             | Phoenix                | 8              | <i>Serratia marcescens</i>        | 2.341 | B |
| 361 | <i>Serratia marcescens</i>                  | S             | Phoenix                | 8              | <i>Serratia marcescens</i>        | 2.247 | B |
| 362 | <i>Serratia marcescens</i>                  | S             | Phoenix                | 8              | <i>Serratia marcescens</i>        | 2.235 | B |
| 396 | <i>Serratia marcescens</i>                  | S             | Phoenix                | 8              | <i>Serratia marcescens</i>        | 2.106 | A |
| 415 | <i>Serratia marcescens</i>                  | S             | Phoenix                | 8              | <i>Serratia marcescens</i>        | 2.120 | A |
| 417 | <i>Serratia marcescens</i>                  | S             | Phoenix                | 8              | <i>Serratia marcescens</i>        | 1.915 | A |
| 526 | <i>Serratia marcescens</i>                  | S             | Phoenix                | 8              | <i>Serratia marcescens</i>        | 2.165 | B |
| 4   | <i>Shewanella putrefaciens</i>              | S             | Phoenix                | 4              | <i>Shewanella putrefaciens</i>    | 2.120 | B |
| 699 | <i>Shigella flexneri</i>                    | S (Not in DB) | Phenotypic, serotyping | Not in DB      | <i>Escherichia coli</i>           | 2.389 | B |
| 698 | <i>Shigella sonnei</i>                      | S (Not in DB) | Phenotypic, serotyping | Not in DB      | <i>Escherichia coli</i>           | 2.336 | A |
| 685 | <i>Slackia exigua</i>                       | S             | 16S                    | 3              | <i>Slackia exigua</i>             | 2.599 | A |
| 132 | <i>Sphingomonas mucosissima</i>             | S             | 16S                    | 1              | <i>Sphingomonas adhaesiva</i>     | 1.290 | C |
| 80  | <i>Sphingomonas paucimobilis</i>            | S             | 16S                    | 3              | <i>Sphingomonas paucimobilis</i>  | 2.432 | B |
| 136 | <i>Sphingomonas paucimobilis</i>            | S             | 16S                    | 3              | <i>Sphingomonas paucimobilis</i>  | 2.087 | A |
| 342 | <i>Staphylococcus</i> , coagulase negative  | G             | Phoenix                | Not applicable | <i>Staphylococcus epidermidis</i> | 2.157 | A |
| 354 | <i>Staphylococcus</i> , coagulase negative  | G             | Phenotypic             | Not applicable | <i>Staphylococcus epidermidis</i> | 2.255 | A |
| 367 | <i>Staphylococcus</i> , coagulase negative  | G             | Phoenix, Phenotypic    | Not applicable | <i>Staphylococcus hominis</i>     | 2.193 | A |
| 378 | <i>Staphylococcus</i> , coagulase negative  | G             | Phenotypic             | Not applicable | <i>Staphylococcus epidermidis</i> | 2.169 | A |
| 395 | <i>Staphylococcus</i> , coagulase negative  | G             | Phoenix, Phenotypic    | Not applicable | <i>Staphylococcus hominis</i>     | 2.403 | A |
| 411 | <i>Staphylococcus</i> , coagulase negative  | G             | Phoenix, Phenotypic    | Not applicable | <i>Staphylococcus epidermidis</i> | 2.154 | A |
| 458 | <i>Staphylococcus</i> , coagulase negative  | G             | Phenotypic             | Not applicable | <i>Staphylococcus epidermidis</i> | 2.368 | A |
| 540 | <i>Staphylococcus</i> , coagulase negative  | G             | Phenotypic             | Not applicable | <i>Staphylococcus epidermidis</i> | 2.288 | A |
| 35  | <i>Staphylococcus aureus</i>                | S             | Phoenix                | 12             | <i>Staphylococcus aureus</i>      | 2.405 | A |
| 36  | <i>Staphylococcus aureus</i>                | S             | Phoenix                | 12             | <i>Staphylococcus aureus</i>      | 2.382 | A |
| 276 | <i>Staphylococcus aureus</i>                | S             | Phenotypic             | 12             | <i>Staphylococcus aureus</i>      | 2.514 | A |
| 277 | <i>Staphylococcus aureus</i>                | S             | 16S                    | 12             | <i>Staphylococcus aureus</i>      | 2.286 | A |
| 340 | <i>Staphylococcus aureus</i>                | S             | Phenotypic             | 12             | <i>Staphylococcus aureus</i>      | 2.487 | A |
| 360 | <i>Staphylococcus aureus</i>                | S             | Phenotypic             | 12             | <i>Staphylococcus aureus</i>      | 2.428 | A |
| 365 | <i>Staphylococcus aureus</i>                | S             | Phoenix                | 12             | <i>Staphylococcus aureus</i>      | 2.347 | A |



|      |                                               |      |                        |       |                                        |       |   |
|------|-----------------------------------------------|------|------------------------|-------|----------------------------------------|-------|---|
| 366  | <i>Staphylococcus aureus</i>                  | S    | Phoenix                | 12    | <i>Staphylococcus aureus</i>           | 2.282 | A |
| 385  | <i>Staphylococcus aureus</i>                  | S    | Phoenix,<br>Phenotypic | 12    | <i>Staphylococcus aureus</i>           | 2.353 | A |
| 390  | <i>Staphylococcus aureus</i>                  | S    | Phoenix,<br>Phenotypic | 12    | <i>Staphylococcus aureus</i>           | 2.396 | A |
| 392  | <i>Staphylococcus aureus</i>                  | S    | Phoenix,<br>Phenotypic | 12    | <i>Staphylococcus aureus</i>           | 2.370 | A |
| 399  | <i>Staphylococcus aureus</i>                  | S    | Phoenix,<br>Phenotypic | 12    | <i>Staphylococcus aureus</i>           | 2.385 | A |
| 407  | <i>Staphylococcus aureus</i>                  | S    | Phoenix,<br>Phenotypic | 12    | <i>Staphylococcus aureus</i>           | 2.456 | A |
| 408  | <i>Staphylococcus aureus</i>                  | S    | Phoenix,<br>Phenotypic | 12    | <i>Staphylococcus aureus</i>           | 2.361 | A |
| 416  | <i>Staphylococcus aureus</i>                  | S    | Phoenix,<br>Phenotypic | 12    | <i>Staphylococcus aureus</i>           | 2.232 | A |
| 490  | <i>Staphylococcus aureus</i>                  | S    | Phenotypic             | 12    | <i>Staphylococcus aureus</i>           | 2.298 | A |
| 492  | <i>Staphylococcus aureus</i>                  | S    | Phenotypic             | 12    | <i>Staphylococcus aureus</i>           | 2.388 | A |
| 493  | <i>Staphylococcus aureus</i>                  | S    | Phenotypic             | 12    | <i>Staphylococcus aureus</i>           | 2.347 | A |
| 494  | <i>Staphylococcus aureus</i>                  | S    | Phenotypic             | 12    | <i>Staphylococcus aureus</i>           | 2.381 | A |
| 495  | <i>Staphylococcus aureus</i>                  | S    | Phenotypic             | 12    | <i>Staphylococcus aureus</i>           | 2.385 | A |
| 517  | <i>Staphylococcus aureus</i>                  | S    | Phoenix                | 12    | <i>Staphylococcus aureus</i>           | 2.211 | A |
| 528  | <i>Staphylococcus aureus</i>                  | S    | Phoenix                | 12    | <i>Staphylococcus aureus</i>           | 2.394 | A |
| 1037 | <i>Staphylococcus aureus</i>                  | S    | Phoenix,<br>Phenotypic | 12    | <i>Staphylococcus aureus</i>           | 2.376 | A |
| 1040 | <i>Staphylococcus aureus</i>                  | S    | Phoenix,<br>Phenotypic | 12    | <i>Staphylococcus aureus</i>           | 2.411 | A |
| 1070 | <i>Staphylococcus aureus</i>                  | S    | QC or type<br>strain   | 12    | <i>Staphylococcus aureus</i>           | 2.427 | A |
| 196  | <i>Staphylococcus capitis</i> / <i>caprae</i> | S-sc | 16S                    | 6   2 | <i>Staphylococcus capitis</i>          | 2.352 | A |
| 422  | <i>Staphylococcus epidermidis</i>             | S    | 16S                    | 9     | <i>Staphylococcus epidermidis</i>      | 2.206 | A |
| 550  | <i>Staphylococcus epidermidis</i>             | S    | 16S                    | 9     | <i>Staphylococcus epidermidis</i>      | 2.143 | A |
| 655  | <i>Staphylococcus epidermidis</i>             | S    | 16S                    | 9     | <i>Staphylococcus epidermidis</i>      | 2.303 | A |
| 166  | <i>Staphylococcus hominis</i>                 | S    | 16S                    | 6     | <i>Staphylococcus hominis</i>          | 2.398 | A |
| 164  | <i>Staphylococcus lugdunensis</i>             | S    | 16S                    | 6     | <i>Staphylococcus lugdunensis</i>      | 2.335 | A |
| 333  | <i>Staphylococcus lugdunensis</i>             | S    | Phenotypic             | 6     | <i>Staphylococcus lugdunensis</i>      | 2.291 | A |
| 696  | <i>Staphylococcus pettenkoferi</i>            | S    | 16S                    | 5     | <i>Staphylococcus pettenkoferi</i>     | 2.34  | A |
| 350  | <i>Staphylococcus saprophyticus</i>           | S    | Phenotypic             | 8     | <i>Staphylococcus saprophyticus</i>    | 1.752 | B |
| 516  | <i>Staphylococcus simulans</i>                | S    | Phoenix                | 5     | <i>Staphylococcus simulans</i>         | 2.279 | A |
| 661  | <i>Stenotrophomonas acidaminiphila</i>        | S    | 16S                    | 1     | <i>Stenotrophomonas acidaminiphila</i> | 2.417 | C |
| 31   | <i>Stenotrophomonas maltophilia</i>           | S    | Phoenix                | 9     | <i>Stenotrophomonas maltophilia</i>    | 2.108 | C |
| 32   | <i>Stenotrophomonas maltophilia</i>           | S    | Phoenix                | 9     | <i>Stenotrophomonas maltophilia</i>    | 2.075 | C |

|      |                                                 |       |                   |                |                                     |       |   |
|------|-------------------------------------------------|-------|-------------------|----------------|-------------------------------------|-------|---|
| 33   | <i>Stenotrophomonas maltophilia</i>             | S     | Phoenix           | 9              | <i>Stenotrophomonas maltophilia</i> | 1.948 | C |
| 71   | <i>Stenotrophomonas maltophilia</i>             | S     | 16S               | 9              | <i>Stenotrophomonas maltophilia</i> | 2.192 | C |
| 153  | <i>Stenotrophomonas maltophilia</i>             | S     | 16S               | 9              | <i>Stenotrophomonas maltophilia</i> | 2.286 | C |
| 296  | <i>Stenotrophomonas maltophilia</i>             | S     | 16S               | 9              | <i>Stenotrophomonas maltophilia</i> | 1.931 | A |
| 644  | <i>Stenotrophomonas maltophilia</i>             | S     | QC or type strain | 9              | <i>Stenotrophomonas maltophilia</i> | 2.034 | C |
| 242  | <i>Stenotrophomonas sp.</i>                     | G     | 16S               | Not applicable | <i>Pseudomonas putida</i>           | 1.345 | C |
| 48   | <i>Streptococcus agalactiae</i>                 | S     | Phenotypic        | 9              | <i>Streptococcus agalactiae</i>     | 2.541 | A |
| 315  | <i>Streptococcus agalactiae</i>                 | S     | Phenotypic        | 9              | <i>Streptococcus agalactiae</i>     | 2.450 | A |
| 326  | <i>Streptococcus agalactiae</i>                 | S     | Phenotypic        | 9              | <i>Streptococcus agalactiae</i>     | 2.518 | A |
| 338  | <i>Streptococcus agalactiae</i>                 | S     | Phenotypic        | 9              | <i>Streptococcus agalactiae</i>     | 2.531 | A |
| 398  | <i>Streptococcus agalactiae</i>                 | S     | Phenotypic        | 9              | <i>Streptococcus agalactiae</i>     | 2.485 | A |
| 1043 | <i>Streptococcus agalactiae</i>                 | S     | Phenotypic        | 9              | <i>Streptococcus agalactiae</i>     | 2.478 | A |
| 40   | <i>Streptococcus anginosus</i>                  | S     | 16S               | 2              | <i>Streptococcus anginosus</i>      | 2.124 | B |
| 49   | <i>Streptococcus anginosus</i>                  | S     | 16S               | 2              | <i>Streptococcus anginosus</i>      | 2.407 | B |
| 445  | <i>Streptococcus anginosus</i>                  | S     | 16S               | 2              | <i>Streptococcus anginosus</i>      | 2.130 | B |
| 250  | <i>Streptococcus australis</i>                  | S     | 16S               | 1              | <i>Streptococcus australis</i>      | 1.829 | B |
| 64   | <i>Streptococcus bovis</i> Group                | S-grp | 16S               | Not applicable | <i>Streptococcus equinus</i>        | 2.203 | B |
| 121  | <i>Streptococcus bovis</i> Group                | S-grp | 16S               | Not applicable | <i>Streptococcus equinus</i>        | 1.936 | C |
| 446  | <i>Streptococcus bovis</i> Group                | S-grp | 16S               | Not applicable | <i>Streptococcus equinus</i>        | 2.183 | B |
| 462  | <i>Streptococcus bovis</i> Group                | S-grp | 16S               | Not applicable | <i>Streptococcus gallolyticus</i>   | 1.949 | A |
| 473  | <i>Streptococcus bovis</i> Group                | S-grp | 16S               | Not applicable | <i>Streptococcus gallolyticus</i>   | 2.201 | B |
| 448  | <i>Streptococcus constellatus</i>               | S     | 16S               | 2              | <i>Streptococcus constellatus</i>   | 2.175 | A |
| 184  | <i>Streptococcus constellatus / intermedius</i> | S-sc  | 16S               | 2   1          | <i>Streptococcus constellatus</i>   | 2.323 | A |
| 297  | <i>Streptococcus cristatus</i>                  | S     | 16S               | 2              | <i>Streptococcus cristatus</i>      | 2.035 | A |
| 194  | <i>Streptococcus dysgalactiae</i>               | S     | 16S               | 5              | <i>Streptococcus dysgalactiae</i>   | 2.193 | B |
| 162  | <i>Streptococcus</i> Group G                    | S-grp | Phenotypic        | Not applicable | <i>Streptococcus dysgalactiae</i>   | 2.313 | B |
| 1038 | <i>Streptococcus</i> Group G                    | S-grp | Phenotypic        | Not applicable | <i>Streptococcus dysgalactiae</i>   | 2.136 | B |
| 200  | <i>Streptococcus intermedius</i>                | S     | 16S               | 1              | <i>Streptococcus intermedius</i>    | 1.976 | B |
| 284  | <i>Streptococcus intermedius</i>                | S     | 16S               | 1              | <i>Streptococcus intermedius</i>    | 2.047 | A |
| 287  | <i>Streptococcus intermedius</i>                | S     | 16S               | 1              | <i>Streptococcus intermedius</i>    | 1.861 | B |
| 289  | <i>Streptococcus intermedius</i>                | S     | 16S               | 1              | <i>Streptococcus constellatus</i>   | 1.928 | A |
| 447  | <i>Streptococcus intermedius</i>                | S     | 16S               | 1              | <i>Streptococcus constellatus</i>   | 1.906 | A |
| 482  | <i>Streptococcus intermedius</i>                | S     | 16S               | 1              | <i>Streptococcus intermedius</i>    | 1.729 | B |
| 460  | <i>Streptococcus mitis</i>                      | S     | 16S               | 1              | <i>Streptococcus pneumoniae</i>     | 2.032 | A |
| 73   | <i>Streptococcus mitis</i> Group                | S-grp | 16S               | Not applicable | <i>Streptococcus oralis</i>         | 1.913 | A |
| 111  | <i>Streptococcus mitis</i> Group                | S-grp | 16S               | Not applicable | <i>Streptococcus pneumoniae</i>     | 1.664 | C |
| 228  | <i>Streptococcus mitis</i> Group                | S-grp | 16S               | Not applicable | <i>Streptococcus gordonii</i>       | 2.264 | A |
| 556  | <i>Streptococcus mutans</i>                     | S     | 16S               | 1              | <i>Streptococcus mutans</i>         | 2.070 | A |
| 131  | <i>Streptococcus pneumoniae</i>                 | S     | 16S               | 9              | <i>Streptococcus pneumoniae</i>     | 2.387 | A |

|      |                                         |               |                   |                |                                         |       |   |
|------|-----------------------------------------|---------------|-------------------|----------------|-----------------------------------------|-------|---|
| 452  | <i>Streptococcus pneumoniae</i>         | S             | Phenotypic        | 9              | <i>Streptococcus pneumoniae</i>         | 1.929 | A |
| 486  | <i>Streptococcus pneumoniae</i>         | S             | Phenotypic        | 9              | <i>Streptococcus pneumoniae</i>         | 2.032 | A |
| 47   | <i>Streptococcus pyogenes</i>           | S             | Phenotypic        | 8              | <i>Streptococcus pyogenes</i>           | 2.517 | A |
| 109  | <i>Streptococcus salivarius</i> Group   | S-grp         | 16S               | Not applicable | <i>Streptococcus vestibularis</i>       | 1.988 | C |
| 248  | <i>Streptococcus salivarius</i> Group   | S-grp         | 16S               | Not applicable | <i>Streptococcus vestibularis</i>       | 1.882 | B |
| 280  | <i>Streptococcus salivarius</i> Group   | S-grp         | 16S               | Not applicable | <i>Streptococcus salivarius</i>         | 1.928 | A |
| 281  | <i>Streptococcus salivarius</i> Group   | S-grp         | 16S               | Not applicable | <i>Streptococcus salivarius</i>         | 2.034 | A |
| 480  | <i>Streptococcus salivarius</i> Group   | S-grp         | 16S               | Not applicable | <i>Streptococcus vestibularis</i>       | 1.924 | A |
| 555  | <i>Streptococcus salivarius</i> Group   | S-grp         | 16S               | Not applicable | <i>Streptococcus salivarius</i>         | 2.351 | A |
| 263  | <i>Streptococcus sanguinis</i>          | S             | 16S               | 4              | <i>Streptococcus sanguinis</i>          | 2.115 | A |
| 426  | <i>Streptococcus sanguinis</i>          | S             | 16S               | 4              | <i>Streptococcus sanguinis</i>          | 2.133 | A |
| 1023 | <i>Streptococcus sanguinis</i>          | S             | 16S               | 4              | <i>Streptococcus sanguinis</i>          | 2.181 | A |
| 424  | <i>Streptomyces</i> sp.                 | G             | 16S               | Not applicable | <i>Streptomyces chartreusis</i>         | 1.979 | A |
| 565  | <i>Streptomyces</i> sp.                 | G             | 16S               | Not applicable | <i>Streptomyces badius</i>              | 1.486 | C |
| 569  | <i>Tsukamurella</i> sp.                 | G             | 16S               | Not applicable | <i>Microbacterium saperdae</i>          | 1.366 | C |
| 671  | <i>Vagococcus fluvialis</i>             | S             | 16S               | 4              | <i>Vagococcus fluvialis</i>             | 2.472 | A |
| 479  | <i>Variovorax paradoxus</i>             | S             | 16S               | 7              | <i>Variovorax paradoxus</i>             | 1.667 | C |
| 157  | <i>Variovorax</i> sp.                   | G             | 16S               | Not applicable | <i>Variovorax paradoxus</i>             | 1.761 | B |
| 670  | <i>Veillonella montpellierensis</i>     | S             | 16S               | 1              | <i>Veillonella montpellierensis</i>     | 2.034 | A |
| 1024 | <i>Veillonella parvula</i>              | S             | 16S               | 2              | <i>Veillonella parvula</i>              | 2.165 | A |
| 641  | <i>Vibrio alginolyticus</i>             | S             | QC or type strain | 4              | <i>Vibrio alginolyticus</i>             | 2.131 | A |
| 580  | <i>Vibrio cholerae</i>                  | S (Not in DB) | 16S, Phenotypic   | Not in DB      | <i>Vibrio albensis</i>                  | 1.935 | A |
| 578  | <i>Vibrio parahaemolyticus</i>          | S             | 16S               | 7              | <i>Vibrio parahaemolyticus</i>          | 2.311 | A |
| 691  | <i>Vibrio vulnificus</i>                | S             | Phoenix           | 5              | <i>Vibrio vulnificus</i>                | 2.4   | A |
| 660  | <i>Weeksella virosa</i>                 | S             | 16S               | 1              | <i>Weeksella virosa</i>                 | 2.377 | A |
| 681  | <i>Wohlfahrtiimonas chitiniclastica</i> | S             | 16S               | 2              | <i>Wohlfahrtiimonas chitiniclastica</i> | 2.255 | A |

<sup>1</sup>S, species level ID by Standard Method; G, genus level ID by Standard Method; S-sc, slash call (ID resolved only to the level of two possible species by Standard Method); S-grp, group or complex level ID by Standard Method; DB, Biotyper database.

<sup>2</sup>QC, quality control strain

<sup>3</sup>MSP, Main Spectra (Biotyper database spectra); DB, Biotyper database.

<sup>4</sup>Isolate #5 was incorrectly identified by Phoenix as *Providencia rustigianii*, ID resolved as *Providencia stuartii* after discrepant analysis.

<sup>5</sup>Isolate #34 was incorrectly identified by Phoenix as *Aeromonas sobria*, ID resolved as *Aeromonas hydrophila* after discrepant analysis.

<sup>6</sup>Isolate #611 was incorrectly identified by Phoenix as *Aeromonas sobria*, ID resolved as *Aeromonas veronii* after discrepant analysis.

Table S2: MALDI-TOF MS data for 183 isolates used to compare Extraction and Direct Smear methods.

| Isolate |                                     | Standard ID    |                                     | Score |                                     |                 |
|---------|-------------------------------------|----------------|-------------------------------------|-------|-------------------------------------|-----------------|
| No.     | Standard Method Identification (ID) | classification | Biotyper ID, Direct Smear (DS)      | (DS)  | Biotyper ID, Extraction             | Score (Extract) |
| 59      | <i>Achromobacter xylosoxidans</i>   | S              | <i>Achromobacter xylosoxidans</i>   | 1.956 | <i>Achromobacter xylosoxidans</i>   | 2.253           |
| 686     | <i>Acidovorax temperans</i>         | S              | <i>Acidovorax temperans</i>         | 2.341 | <i>Acidovorax temperans</i>         | 2.393           |
| 656     | <i>Acinetobacter junii</i>          | S              | <i>Acinetobacter junii</i>          | 2.363 | <i>Acinetobacter junii</i>          | 2.47            |
| 29      | <i>Acinetobacter lwoffii</i>        | S              | <i>Acinetobacter lwoffii</i>        | 2.016 | <i>Acinetobacter lwoffii</i>        | 2.119           |
| 668     | <i>Acinetobacter radioresistens</i> | S              | <i>Acinetobacter radioresistens</i> | 2.424 | <i>Acinetobacter radioresistens</i> | 2.195           |
| 690     | <i>Acinetobacter schindleri</i>     | S              | <i>Acinetobacter schindleri</i>     | 1.895 | <i>Acinetobacter schindleri</i>     | 2.088           |
| 1013    | <i>Actinomyces europaeus</i>        | S              | <i>Actinomyces europaeus</i>        | 2.077 | <i>Actinomyces europaeus</i>        | 2.285           |
| 1056    | <i>Actinomyces funkei</i>           | S              | <i>Actinomyces funkei</i>           | 1.770 | <i>Actinomyces funkei</i>           | 2.005           |
| 67      | <i>Actinomyces neuii</i>            | S              | <i>Actinomyces neuii</i>            | 1.601 | <i>Actinomyces neuii</i>            | 2.149           |
| 453     | <i>Actinomyces neuii</i>            | S              | <i>Actinomyces neuii</i>            | 1.834 | <i>Actinomyces neuii</i>            | 1.985           |
| 687     | <i>Actinomyces odontolyticus</i>    | S              | <i>Actinomyces odontolyticus</i>    | 1.962 | <i>Actinomyces odontolyticus</i>    | 2.137           |
| 710     | <i>Actinomyces turicensis</i>       | S              | <i>Actinomyces turicensis</i>       | 2.054 | <i>Actinomyces turicensis</i>       | 2.187           |
| 56      | <i>Aerococcus urinae</i>            | S              | <i>Aerococcus urinae</i>            | 1.767 | <i>Aerococcus urinae</i>            | 2.039           |
| 34      | <i>Aeromonas hydrophila</i>         | S              | <i>Aeromonas hydrophila</i>         | 2.129 | <i>Aeromonas hydrophila</i>         | 2.021           |
| 611     | <i>Aeromonas veronii</i>            | S              | <i>Aeromonas veronii</i>            | 2.353 | <i>Aeromonas veronii</i>            | 2.236           |
| 700     | <i>Agromyces mediolanus</i>         | S              | <i>Agromyces mediolanus</i>         | 2.29  | <i>Agromyces mediolanus</i>         | 2.494           |
| 60      | <i>Alcaligenes faecalis</i>         | S              | <i>Alcaligenes faecalis</i>         | 2.045 | <i>Alcaligenes faecalis</i>         | 2.439           |
| 598     | <i>Alistipes finegoldii</i>         | S              | <i>Alistipes finegoldii</i>         | 2.471 | <i>Alistipes finegoldii</i>         | 2.427           |
| 697     | <i>Alloscardovia omnicoles</i>      | S              | <i>Alloscardovia omnicoles</i>      | 1.708 | <i>Alloscardovia omnicoles</i>      | 2.098           |
| 545     | <i>Arcanobacterium bernardiae</i>   | S              | <i>Arcanobacterium bernardiae</i>   | 1.998 | <i>Arcanobacterium bernardiae</i>   | 2.124           |
| 676     | <i>Arcobacter butzleri</i>          | S              | <i>Arcobacter butzleri</i>          | 2.268 | <i>Arcobacter butzleri</i>          | 2.293           |
| 672     | <i>Bacillus cereus</i>              | S              | <i>Bacillus cereus</i>              | 2.312 | <i>Bacillus cereus</i>              | 2.564           |
| 561     | <i>Bacteroides fragilis</i>         | S              | <i>Bacteroides fragilis</i>         | 2.356 | <i>Bacteroides fragilis</i>         | 2.344           |
| 1011    | <i>Bacteroides fragilis</i>         | S              | <i>Bacteroides fragilis</i>         | 2.297 | <i>Bacteroides fragilis</i>         | 2.406           |
| 606     | <i>Bacteroides ovatus</i>           | S              | <i>Bacteroides ovatus</i>           | 1.999 | <i>Bacteroides ovatus</i>           | 2.049           |
| 688     | <i>Bacteroides uniformis</i>        | S              | <i>Bacteroides uniformis</i>        | 2.56  | <i>Bacteroides uniformis</i>        | 2.544           |
| 1025    | <i>Bacteroides vulgatus</i>         | S              | <i>Bacteroides vulgatus</i>         | 1.947 | <i>Bacteroides vulgatus</i>         | 2.202           |
| 1047    | <i>Bifidobacterium breve</i>        | S              | <i>Bifidobacterium breve</i>        | 1.409 | <i>Bifidobacterium breve</i>        | 1.802           |
| 663     | <i>Bifidobacterium longum</i>       | S              | <i>Bifidobacterium longum</i>       | 2.074 | <i>Bifidobacterium longum</i>       | 2.28            |
| 558     | <i>Bordetella bronchiseptica</i>    | S              | <i>Bordetella bronchiseptica</i>    | 2.099 | <i>Bordetella bronchiseptica</i>    | 2.317           |
| 197     | <i>Bordetella holmesii</i>          | S              | <i>Bordetella avium</i>             | 1.272 | <i>Bordetella avium</i>             | 1.343           |
| 577     | <i>Bordetella parapertussis</i>     | S              | <i>Bordetella parapertussis</i>     | 1.991 | <i>Bordetella parapertussis</i>     | 2.229           |
| 576     | <i>Bordetella pertussis</i>         | S              | <i>Bordetella pertussis</i>         | 1.949 | <i>Bordetella pertussis</i>         | 2.337           |
| 553     | <i>Bordetella trematum</i>          | S              | <i>Bordetella trematum</i>          | 1.765 | <i>Bordetella trematum</i>          | 2.082           |
| 74      | <i>Brevundimonas diminuta</i>       | S              | <i>Brevundimonas diminuta</i>       | 1.917 | <i>Brevundimonas diminuta</i>       | 1.914           |
| 669     | <i>Burkholderia caribensis</i>      | S              | <i>Burkholderia caribensis</i>      | 2.372 | <i>Burkholderia caribensis</i>      | 2.459           |
| 689     | <i>Burkholderia fungorum</i>        | S              | <i>Sphingomonas adhaesiva</i>       | 1.365 | <i>Streptococcus pneumoniae</i>     | 1.34            |

|      |                                             |   |                                             |       |                                             |       |
|------|---------------------------------------------|---|---------------------------------------------|-------|---------------------------------------------|-------|
| 612  | <i>Campylobacter coli</i>                   | S | <i>Campylobacter coli</i>                   | 2.117 | <i>Campylobacter coli</i>                   | 2.317 |
| 613  | <i>Campylobacter coli</i>                   | S | <i>Campylobacter coli</i>                   | 2.203 | <i>Campylobacter coli</i>                   | 2.267 |
| 614  | <i>Campylobacter jejuni</i>                 | S | <i>Campylobacter jejuni</i>                 | 2.239 | <i>Campylobacter jejuni</i>                 | 2.362 |
| 18   | <i>Citrobacter amalonaticus</i>             | S | <i>Citrobacter amalonaticus</i>             | 2.282 | <i>Citrobacter amalonaticus</i>             | 2.311 |
| 522  | <i>Citrobacter freundii</i>                 | S | <i>Citrobacter freundii</i>                 | 2.387 | <i>Citrobacter freundii</i>                 | 2.068 |
| 704  | <i>Clostridium aldenense</i>                | S | <i>Clostridium aldenense</i>                | 2.244 | <i>Clostridium aldenense</i>                | 2.297 |
| 1061 | <i>Clostridium bifermentans</i>             | S | <i>Clostridium bifermentans</i>             | 1.944 | <i>Clostridium bifermentans</i>             | 2.05  |
| 1022 | <i>Clostridium cadaveris</i>                | S | <i>Clostridium cadaveris</i>                | 2.19  | <i>Clostridium cadaveris</i>                | 2.286 |
| 581  | <i>Clostridium difficile</i>                | S | <i>Clostridium difficile</i>                | 2.286 | <i>Clostridium difficile</i>                | 2.485 |
| 599  | <i>Clostridium difficile</i>                | S | <i>Clostridium difficile</i>                | 2.3   | <i>Clostridium difficile</i>                | 2.382 |
| 1018 | <i>Clostridium difficile</i>                | S | <i>Clostridium difficile</i>                | 1.951 | <i>Clostridium difficile</i>                | 2.458 |
| 1015 | <i>Clostridium dispersicum</i>              | S | <i>Clostridium dispersicum</i>              | 2.089 | <i>Clostridium dispersicum</i>              | 2.232 |
| 1019 | <i>Clostridium glycolicum</i>               | S | <i>Clostridium glycolicum</i>               | 1.806 | <i>Clostridium glycolicum</i>               | 1.793 |
| 1020 | <i>Clostridium hathewayi</i>                | S | <i>Clostridium hathewayi</i>                | 2.135 | <i>Clostridium hathewayi</i>                | 2.284 |
| 1021 | <i>Clostridium innocuum</i>                 | S | <i>Clostridium innocuum</i>                 | 1.933 | <i>Clostridium innocuum</i>                 | 1.926 |
| 618  | <i>Clostridium perfringens</i>              | S | <i>Clostridium perfringens</i>              | 2.325 | <i>Clostridium perfringens</i>              | 2.51  |
| 1009 | <i>Clostridium perfringens</i>              | S | <i>Clostridium perfringens</i>              | 1.853 | <i>Clostridium perfringens</i>              | 2.49  |
| 664  | <i>Clostridium ramosum</i>                  | S | <i>Clostridium ramosum</i>                  | 2.073 | <i>Clostridium ramosum</i>                  | 2.182 |
| 568  | <i>Clostridium septicum</i>                 | S | <i>Clostridium septicum</i>                 | 2.046 | <i>Clostridium septicum</i>                 | 2.201 |
| 1029 | <i>Clostridium septicum</i>                 | S | <i>Clostridium septicum</i>                 | 1.972 | <i>Clostridium septicum</i>                 | 2.135 |
| 1049 | <i>Clostridium septicum</i>                 | S | <i>Clostridium septicum</i>                 | 2.162 | <i>Clostridium septicum</i>                 | 2.23  |
| 572  | <i>Clostridium sordellii</i>                | S | <i>Clostridium sordellii</i>                | 1.785 | <i>Clostridium sordellii</i>                | 1.929 |
| 1007 | <i>Clostridium sordellii</i>                | S | <i>Clostridium sordellii</i>                | 1.916 | <i>Clostridium sordellii</i>                | 2.128 |
| 1050 | <i>Clostridium sporogenes</i>               | S | <i>Clostridium sporogenes</i>               | 1.881 | <i>Clostridium sporogenes</i>               | 2.086 |
| 1028 | <i>Clostridium symbiosum</i>                | S | <i>Clostridium symbiosum</i>                | 1.983 | <i>Clostridium symbiosum</i>                | 2.012 |
| 605  | <i>Clostridium tertium</i>                  | S | <i>Clostridium tertium</i>                  | 2.095 | <i>Clostridium tertium</i>                  | 2.258 |
| 658  | <i>Corynebacterium bovis</i>                | S | <i>Corynebacterium bovis</i>                | 1.96  | <i>Corynebacterium bovis</i>                | 2.018 |
| 708  | <i>Corynebacterium coyleae</i>              | S | <i>Corynebacterium coyleae</i>              | 1.781 | <i>Corynebacterium coyleae</i>              | 2.105 |
| 706  | <i>Corynebacterium imitans</i>              | S | <i>Corynebacterium imitans</i>              | 2.114 | <i>Corynebacterium imitans</i>              | 2.233 |
| 51   | <i>Corynebacterium jeikeium</i>             | S | <i>Corynebacterium jeikeium</i>             | 1.826 | <i>Corynebacterium jeikeium</i>             | 2.156 |
| 96   | <i>Corynebacterium pseudodiphtheriticum</i> | S | <i>Corynebacterium pseudodiphtheriticum</i> | 2.335 | <i>Corynebacterium pseudodiphtheriticum</i> | 2.329 |
| 547  | <i>Corynebacterium pseudodiphtheriticum</i> | S | <i>Corynebacterium propinquum</i>           | 1.476 | <i>Corynebacterium propinquum</i>           | 2.003 |
| 659  | <i>Corynebacterium resistens</i>            | S | <i>Corynebacterium resistens</i>            | 2.049 | <i>Corynebacterium resistens</i>            | 1.963 |
| 542  | <i>Corynebacterium striatum</i>             | S | <i>Corynebacterium striatum</i>             | 2.321 | <i>Corynebacterium striatum</i>             | 2.483 |
| 240  | <i>Corynebacterium tuberculostearicum</i>   | S | <i>Corynebacterium tuberculostearicum</i>   | 1.745 | <i>Corynebacterium tuberculostearicum</i>   | 1.95  |
| 63   | <i>Dermabacter hominis</i>                  | S | <i>Dermabacter hominis</i>                  | 1.75  | <i>Dermabacter hominis</i>                  | 1.938 |
| 139  | <i>Dermabacter hominis</i>                  | S | <i>Dermabacter hominis</i>                  | 1.518 | <i>Dermabacter hominis</i>                  | 1.905 |
| 519  | <i>Enterobacter aerogenes</i>               | S | <i>Enterobacter aerogenes</i>               | 2.248 | <i>Enterobacter aerogenes</i>               | 2.351 |
| 527  | <i>Enterobacter aerogenes</i>               | S | <i>Enterobacter aerogenes</i>               | 2.207 | <i>Enterobacter aerogenes</i>               | 2.515 |
| 538  | <i>Enterobacter cloacae</i>                 | S | <i>Enterobacter cloacae</i>                 | 2.174 | <i>Enterobacter cloacae</i>                 | 2.247 |
| 536  | <i>Enterococcus faecalis</i>                | S | <i>Enterococcus faecalis</i>                | 2.053 | <i>Enterococcus faecalis</i>                | 2.514 |

|      |                                  |   |                                   |       |                                   |       |
|------|----------------------------------|---|-----------------------------------|-------|-----------------------------------|-------|
| 1067 | <i>Enterococcus faecalis</i>     | S | <i>Enterococcus faecalis</i>      | 2.191 | <i>Enterococcus faecalis</i>      | 2.547 |
| 38   | <i>Enterococcus faecium</i>      | S | <i>Enterococcus faecium</i>       | 2.332 | <i>Enterococcus faecium</i>       | 2.480 |
| 39   | <i>Enterococcus raffinosus</i>   | S | <i>Enterococcus raffinosus</i>    | 1.875 | <i>Enterococcus raffinosus</i>    | 1.998 |
| 530  | <i>Escherichia coli</i>          | S | <i>Escherichia coli</i>           | 2.212 | <i>Escherichia coli</i>           | 2.268 |
| 535  | <i>Escherichia coli</i>          | S | <i>Escherichia coli</i>           | 2.126 | <i>Escherichia coli</i>           | 2.245 |
| 1066 | <i>Escherichia coli</i>          | S | <i>Escherichia coli</i>           | 2.392 | <i>Escherichia coli</i>           | 2.416 |
| 662  | <i>Facklamia languida</i>        | S | <i>Facklamia languida</i>         | 2.126 | <i>Facklamia languida</i>         | 2.103 |
| 603  | <i>Finegoldia magna</i>          | S | <i>Finegoldia magna</i>           | 2.08  | <i>Finegoldia magna</i>           | 2.1   |
| 1014 | <i>Finegoldia magna</i>          | S | <i>Finegoldia magna</i>           | 1.708 | <i>Finegoldia magna</i>           | 2.095 |
| 1036 | <i>Fusobacterium necrophorum</i> | S | <i>Fusobacterium necrophorum</i>  | 2.035 | <i>Fusobacterium necrophorum</i>  | 2.148 |
| 564  | <i>Fusobacterium nucleatum</i>   | S | <i>Listeria grayi</i>             | 1.477 | <i>Shewanella frigidimarina</i>   | 1.466 |
| 600  | <i>Fusobacterium nucleatum</i>   | S | <i>Fusobacterium naviforme</i>    | 2.035 | <i>Fusobacterium naviforme</i>    | 1.924 |
| 703  | <i>Gardnerella vaginalis</i>     | S | <i>Gardnerella vaginalis</i>      | 1.905 | <i>Gardnerella vaginalis</i>      | 2.022 |
| 54   | <i>Granulicatella adiacens</i>   | S | <i>Granulicatella adiacens</i>    | 1.941 | <i>Granulicatella adiacens</i>    | 1.955 |
| 99   | <i>Haemophilus influenzae</i>    | S | <i>Haemophilus influenzae</i>     | 2.234 | <i>Haemophilus influenzae</i>     | 2.274 |
| 457  | <i>Haemophilus influenzae</i>    | S | <i>Haemophilus influenzae</i>     | 2.13  | <i>Haemophilus influenzae</i>     | 2.091 |
| 701  | <i>Haemophilus pittmaniae</i>    | S | <i>Haemophilus pittmaniae</i>     | 2.205 | <i>Haemophilus pittmaniae</i>     | 2.174 |
| 684  | <i>Hafnia alvei</i>              | S | <i>Hafnia alvei</i>               | 2.538 | <i>Hafnia alvei</i>               | 2.507 |
| 702  | <i>Helcococcus kunzii</i>        | S | <i>Helcococcus kunzii</i>         | 2.53  | <i>Helcococcus kunzii</i>         | 2.477 |
| 693  | <i>Kingella kingae</i>           | S | <i>Kingella kingae</i>            | 2.194 | <i>Kingella kingae</i>            | 2.168 |
| 694  | <i>Kingella kingae</i>           | S | <i>Kingella kingae</i>            | 2.054 | <i>Kingella kingae</i>            | 2.008 |
| 695  | <i>Kingella kingae</i>           | S | <i>Kingella kingae</i>            | 2.162 | <i>Kingella kingae</i>            | 2.168 |
| 41   | <i>Klebsiella oxytoca</i>        | S | <i>Klebsiella oxytoca</i>         | 2.264 | <i>Klebsiella oxytoca</i>         | 2.231 |
| 85   | <i>Klebsiella oxytoca</i>        | S | <i>Klebsiella oxytoca</i>         | 2.292 | <i>Klebsiella oxytoca</i>         | 2.399 |
| 525  | <i>Klebsiella oxytoca</i>        | S | <i>Klebsiella oxytoca</i>         | 2.138 | <i>Klebsiella oxytoca</i>         | 2.315 |
| 541  | <i>Klebsiella oxytoca</i>        | S | <i>Raoultella ornithinolytica</i> | 2.63  | <i>Raoultella ornithinolytica</i> | 2.67  |
| 539  | <i>Klebsiella pneumoniae</i>     | S | <i>Klebsiella pneumoniae</i>      | 2.125 | <i>Klebsiella pneumoniae</i>      | 2.316 |
| 682  | <i>Lactobacillus brevis</i>      | S | <i>Lactobacillus brevis</i>       | 2.312 | <i>Lactobacillus brevis</i>       | 2.169 |
| 709  | <i>Lactobacillus delbrueckii</i> | S | <i>Lactobacillus delbrueckii</i>  | 2.347 | <i>Lactobacillus delbrueckii</i>  | 2.438 |
| 675  | <i>Lactobacillus murinus</i>     | S | <i>Lactobacillus murinus</i>      | 2.028 | <i>Lactobacillus murinus</i>      | 2.241 |
| 439  | <i>Lactobacillus rhamnosus</i>   | S | <i>Lactobacillus rhamnosus</i>    | 1.862 | <i>Lactobacillus rhamnosus</i>    | 2.223 |
| 679  | <i>Legionella micdadei</i>       | S | <i>Legionella micdadei</i>        | 2.022 | <i>Legionella micdadei</i>        | 1.941 |
| 554  | <i>Listeria monocytogenes</i>    | S | <i>Listeria monocytogenes</i>     | 2.091 | <i>Listeria monocytogenes</i>     | 2.381 |
| 677  | <i>Massilia timonae</i>          | S | <i>Massilia timonae</i>           | 1.958 | <i>Massilia timonae</i>           | 2.072 |
| 673  | <i>Moraxella atlantae</i>        | S | <i>Moraxella atlantae</i>         | 2.041 | <i>Moraxella atlantae</i>         | 1.94  |
| 53   | <i>Moraxella nonliquefaciens</i> | S | <i>Moraxella nonliquefaciens</i>  | 1.787 | <i>Moraxella nonliquefaciens</i>  | 1.954 |
| 156  | <i>Moraxella nonliquefaciens</i> | S | <i>Moraxella nonliquefaciens</i>  | 1.874 | <i>Moraxella nonliquefaciens</i>  | 1.991 |
| 126  | <i>Moraxella osloensis</i>       | S | <i>Moraxella osloensis</i>        | 1.946 | <i>Moraxella osloensis</i>        | 2.012 |
| 185  | <i>Moraxella osloensis</i>       | S | <i>Moraxella osloensis</i>        | 1.726 | <i>Moraxella osloensis</i>        | 2.086 |
| 518  | <i>Morganella morganii</i>       | S | <i>Morganella morganii</i>        | 2.284 | <i>Morganella morganii</i>        | 2.464 |
| 705  | <i>Neisseria bacilliformis</i>   | S | <i>Neisseria bacilliformis</i>    | 1.62  | <i>Neisseria bacilliformis</i>    | 1.878 |

|      |                                       |   |                                      |       |                                       |       |
|------|---------------------------------------|---|--------------------------------------|-------|---------------------------------------|-------|
| 106  | <i>Neisseria elongata</i>             | S | <i>Neisseria elongata</i>            | 1.882 | <i>Neisseria elongata</i>             | 1.89  |
| 478  | <i>Neisseria elongata</i>             | S | <i>Neisseria elongata</i>            | 2.056 | <i>Neisseria elongata</i>             | 1.985 |
| 1004 | <i>Neisseria gonorrhoeae</i>          | S | <i>Neisseria gonorrhoeae</i>         | 2.256 | <i>Neisseria gonorrhoeae</i>          | 2.3   |
| 583  | <i>Neisseria meningitidis</i>         | S | <i>Neisseria meningitidis</i>        | 2.092 | <i>Neisseria meningitidis</i>         | 2.284 |
| 559  | <i>Neisseria weaveri</i>              | S | <i>Neisseria weaveri</i>             | 2.151 | <i>Neisseria weaveri</i>              | 1.987 |
| 72   | <i>Nocardia nova</i>                  | S | <i>Nocardia nova</i>                 | 1.945 | <i>Nocardia nova</i>                  | 2.415 |
| 55   | <i>Oligella urethralis</i>            | S | <i>Oligella urethralis</i>           | 2.127 | <i>Oligella urethralis</i>            | 2.134 |
| 573  | <i>Paracoccus yeei</i>                | S | <i>Candida albicans</i>              | 1.39  | <i>Methylobacterium organophilum</i>  | 1.689 |
| 1012 | <i>Parvimonas micra</i>               | S | <i>Parvimonas micra</i>              | 1.663 | <i>Parvimonas micra</i>               | 1.744 |
| 1053 | <i>Parvimonas micra</i>               | S | <i>Weissella confusa</i>             | 1.385 | <i>Parvimonas micra</i>               | 1.468 |
| 90   | <i>Pasteurella canis</i>              | S | <i>Pasteurella canis</i>             | 2.346 | <i>Pasteurella canis</i>              | 2.360 |
| 477  | <i>Pasteurella canis</i>              | S | <i>Pasteurella canis</i>             | 2.077 | <i>Pasteurella canis</i>              | 2.194 |
| 1003 | <i>Peptostreptococcus anaerobius</i>  | S | <i>Peptostreptococcus anaerobius</i> | 1.808 | <i>Peptostreptococcus anaerobius</i>  | 1.953 |
| 692  | <i>Plesiomonas shigelloides</i>       | S | <i>Plesiomonas shigelloides</i>      | 2.094 | <i>Plesiomonas shigelloides</i>       | 2.123 |
| 604  | <i>Prevotella bivia</i>               | S | <i>Prevotella bivia</i>              | 1.841 | <i>Prevotella bivia</i>               | 2.049 |
| 1005 | <i>Prevotella buccalis</i>            | S | <i>Prevotella buccalis</i>           | 1.592 | <i>Prevotella buccalis</i>            | 1.896 |
| 1048 | <i>Prevotella disiens</i>             | S | <i>Prevotella disiens</i>            | 2.082 | <i>Prevotella disiens</i>             | 2.164 |
| 1001 | <i>Prevotella melaninogenica</i>      | S | <i>Prevotella melaninogenica</i>     | 1.728 | <i>Prevotella melaninogenica</i>      | 1.834 |
| 665  | <i>Prevotella oris</i>                | S | <i>Prevotella oris</i>               | 2.478 | <i>Prevotella oris</i>                | 2.394 |
| 75   | <i>Propionibacterium acnes</i>        | S | <i>Propionibacterium acnes</i>       | 2.279 | <i>Propionibacterium acnes</i>        | 2.385 |
| 323  | <i>Propionibacterium acnes</i>        | S | <i>Propionibacterium acnes</i>       | 1.912 | <i>Propionibacterium acnes</i>        | 2.044 |
| 601  | <i>Propionibacterium acnes</i>        | S | <i>Propionibacterium acnes</i>       | 2.008 | <i>Propionibacterium acnes</i>        | 2.216 |
| 607  | <i>Propionibacterium acnes</i>        | S | <i>Propionibacterium acnes</i>       | 1.76  | <i>Propionibacterium acnes</i>        | 1.927 |
| 1063 | <i>Propionibacterium acnes</i>        | S | <i>Cupriavidus necator</i>           | 1.497 | <i>Propionibacterium acnes</i>        | 1.597 |
| 666  | <i>Propionibacterium granulosum</i>   | S | <i>Propionibacterium granulosum</i>  | 2.103 | <i>Propionibacterium granulosum</i>   | 2.377 |
| 529  | <i>Proteus mirabilis</i>              | S | <i>Proteus mirabilis</i>             | 2.103 | <i>Proteus mirabilis</i>              | 2.391 |
| 537  | <i>Proteus mirabilis</i>              | S | <i>Proteus mirabilis</i>             | 2.219 | <i>Proteus mirabilis</i>              | 2.481 |
| 523  | <i>Proteus vulgaris</i>               | S | <i>Proteus vulgaris</i>              | 2.144 | <i>Proteus vulgaris</i>               | 2.436 |
| 6    | <i>Providencia stuartii</i>           | S | <i>Providencia stuartii</i>          | 2.272 | <i>Providencia stuartii</i>           | 2.267 |
| 534  | <i>Pseudomonas aeruginosa</i>         | S | <i>Pseudomonas aeruginosa</i>        | 1.756 | <i>Pseudomonas aeruginosa</i>         | 2.436 |
| 551  | <i>Pseudomonas aeruginosa</i>         | S | <i>Pseudomonas aeruginosa</i>        | 2.138 | <i>Pseudomonas aeruginosa</i>         | 2.369 |
| 1069 | <i>Pseudomonas aeruginosa</i>         | S | <i>Pseudomonas aeruginosa</i>        | 2.445 | <i>Pseudomonas aeruginosa</i>         | 2.408 |
| 549  | <i>Pseudomonas citronellolis</i>      | S | <i>Pseudomonas citronellolis</i>     | 2.057 | <i>Pseudomonas citronellolis</i>      | 2.205 |
| 674  | <i>Pseudomonas luteola</i>            | S | <i>Pseudomonas luteola</i>           | 2.273 | <i>Pseudomonas luteola</i>            | 2.324 |
| 1065 | <i>Pseudomonas stutzeri</i>           | S | <i>Pseudomonas stutzeri</i>          | 2.19  | <i>Pseudomonas stutzeri</i>           | 2.384 |
| 657  | <i>Ralstonia mannitolilytica</i>      | S | <i>Ralstonia mannitolilytica</i>     | 1.987 | <i>Ralstonia mannitolilytica</i>      | 1.874 |
| 680  | <i>Ralstonia pickettii</i>            | S | <i>Ralstonia pickettii</i>           | 2.477 | <i>Ralstonia pickettii</i>            | 2.363 |
| 43   | <i>Rhizobium radiobacter</i>          | S | <i>Rhizobium radiobacter</i>         | 1.92  | <i>Rhizobium radiobacter</i>          | 2.148 |
| 571  | <i>Rhodococcus corynebacterioides</i> | S | <i>Neisseria gonorrhoeae</i>         | 1.351 | <i>Rhodococcus corynebacterioides</i> | 1.56  |
| 616  | <i>Rhodococcus erythropolis</i>       | S | <i>Rhodococcus erythropolis</i>      | 2.167 | <i>Rhodococcus erythropolis</i>       | 1.934 |
| 52   | <i>Roseomonas mucosa</i>              | S | <i>Roseomonas mucosa</i>             | 2.293 | <i>Roseomonas mucosa</i>              | 2.477 |

|      |                                         |   |                                         |       |                                         |       |
|------|-----------------------------------------|---|-----------------------------------------|-------|-----------------------------------------|-------|
| 582  | <i>Salmonella typhi</i>                 | S | <i>Salmonella sp</i>                    | 2.111 | <i>Salmonella sp</i>                    | 2.043 |
| 526  | <i>Serratia marcescens</i>              | S | <i>Serratia marcescens</i>              | 2.141 | <i>Serratia marcescens</i>              | 2.165 |
| 4    | <i>Shewanella putrifaciens</i>          | S | <i>Shewanella putrifaciens</i>          | 2.052 | <i>Shewanella putrifaciens</i>          | 2.120 |
| 685  | <i>Slackia exigua</i>                   | S | <i>Slackia exigua</i>                   | 2.458 | <i>Slackia exigua</i>                   | 2.599 |
| 80   | <i>Sphingomonas paucimobilis</i>        | S | <i>Sphingomonas paucimobilis</i>        | 2.327 | <i>Sphingomonas paucimobilis</i>        | 2.432 |
| 517  | <i>Staphylococcus aureus</i>            | S | <i>Staphylococcus aureus</i>            | 2.205 | <i>Staphylococcus aureus</i>            | 2.211 |
| 528  | <i>Staphylococcus aureus</i>            | S | <i>Staphylococcus aureus</i>            | 2.043 | <i>Staphylococcus aureus</i>            | 2.394 |
| 1070 | <i>Staphylococcus aureus</i>            | S | <i>Staphylococcus aureus</i>            | 2.324 | <i>Staphylococcus aureus</i>            | 2.427 |
| 550  | <i>Staphylococcus epidermidis</i>       | S | <i>Staphylococcus epidermidis</i>       | 2.029 | <i>Staphylococcus epidermidis</i>       | 2.164 |
| 696  | <i>Staphylococcus pettenkoferi</i>      | S | <i>Staphylococcus pettenkoferi</i>      | 2.28  | <i>Staphylococcus pettenkoferi</i>      | 2.34  |
| 661  | <i>Stenotrophomonas acidaminiphila</i>  | S | <i>Stenotrophomonas acidaminiphila</i>  | 2.287 | <i>Stenotrophomonas acidaminiphila</i>  | 2.417 |
| 32   | <i>Stenotrophomonas maltophilia</i>     | S | <i>Stenotrophomonas maltophilia</i>     | 2.194 | <i>Stenotrophomonas maltophilia</i>     | 2.201 |
| 48   | <i>Streptococcus agalactiae</i>         | S | <i>Streptococcus agalactiae</i>         | 1.949 | <i>Streptococcus agalactiae</i>         | 2.498 |
| 556  | <i>Streptococcus mutans</i>             | S | <i>Streptococcus mutans</i>             | 1.999 | <i>Streptococcus mutans</i>             | 1.778 |
| 47   | <i>Streptococcus pyogenes</i>           | S | <i>Streptococcus pyogenes</i>           | 2.31  | <i>Streptococcus pyogenes</i>           | 2.517 |
| 1023 | <i>Streptococcus sanguinis</i>          | S | <i>Streptococcus sanguinis</i>          | 1.676 | <i>Streptococcus sanguinis</i>          | 2.182 |
| 671  | <i>Vagococcus fluvialis</i>             | S | <i>Vagococcus fluvialis</i>             | 2.347 | <i>Vagococcus fluvialis</i>             | 2.472 |
| 670  | <i>Veillonella montpellierensis</i>     | S | <i>Veillonella montpellierensis</i>     | 2.476 | <i>Veillonella montpellierensis</i>     | 2.034 |
| 1024 | <i>Veillonella parvula</i>              | S | <i>Veillonella parvula</i>              | 2.181 | <i>Veillonella parvula</i>              | 2.165 |
| 578  | <i>Vibrio parahaemolyticus</i>          | S | <i>Vibrio parahaemolyticus</i>          | 2.231 | <i>Vibrio parahaemolyticus</i>          | 2.311 |
| 691  | <i>Vibrio vulnificus</i>                | S | <i>Vibrio vulnificus</i>                | 2.258 | <i>Vibrio vulnificus</i>                | 2.4   |
| 660  | <i>Weeksella virosa</i>                 | S | <i>Weeksella virosa</i>                 | 2.171 | <i>Weeksella virosa</i>                 | 2.377 |
| 681  | <i>Wohlfahrtiimonas chitiniclastica</i> | S | <i>Wohlfahrtiimonas chitiniclastica</i> | 2.173 | <i>Wohlfahrtiimonas chitiniclastica</i> | 2.255 |



Table S3: Isolates discrepant between MALDI-TOF MS and standard method identification.

| Isolate |                                             | MALDI                               |       |                                             |
|---------|---------------------------------------------|-------------------------------------|-------|---------------------------------------------|
| No.     | Standard Method Identification (ID)         | MALDI ID                            | score | Resolved ID                                 |
| 470     | <i>Actinomadura formosensis</i>             | <i>Clostridium tetani</i>           | 1.406 | <i>Actinomadura formosensis</i>             |
| 34      | <i>Aeromonas sobria</i>                     | <i>Aeromonas hydrophila</i>         | 2.021 | <i>Aeromonas hydrophila</i>                 |
| 611     | <i>Aeromonas sobria</i>                     | <i>Aeromonas veronii</i>            | 2.236 | <i>Aeromonas veronii</i>                    |
| 177     | <i>Bordetella pertussis</i>                 | <i>Bordetella bronchiseptica</i>    | 2.264 | <i>Bordetella pertussis</i>                 |
| 150     | <i>Burkholderia cepacia</i>                 | <i>Burkholderia cenocepacia</i>     | 1.995 | <i>Burkholderia cepacia</i>                 |
| 645     | <i>Burkholderia cepacia</i>                 | <i>Burkholderia cenocepacia</i>     | 2.474 | <i>Burkholderia cepacia</i>                 |
| 1       | <i>Citrobacter braakii</i>                  | <i>Citrobacter sedlakii</i>         | 2.154 | <i>Citrobacter braakii</i>                  |
| 15      | <i>Citrobacter braakii</i>                  | <i>Citrobacter freundii</i>         | 2.161 | <i>Citrobacter braakii</i>                  |
| 17      | <i>Citrobacter freundii</i>                 | <i>Citrobacter braakii</i>          | 2.188 | <i>Citrobacter freundii</i>                 |
| 521     | <i>Citrobacter werkmanii</i>                | <i>Citrobacter freundii</i>         | 1.986 | <i>Citrobacter werkmanii</i>                |
| 602     | <i>Clostridium bolteae</i>                  | <i>Clostridium clostridioforme</i>  | 2.118 | <i>Clostridium bolteae</i>                  |
| 265     | <i>Corynebacterium aurimucosum</i>          | <i>Corynebacterium minutissimum</i> | 2.016 | <i>Corynebacterium aurimucosum</i>          |
| 547     | <i>Corynebacterium pseudodiphtheriticum</i> | <i>Corynebacterium propinquum</i>   | 2.204 | <i>Corynebacterium pseudodiphtheriticum</i> |
| 130     | <i>Enterobacter cancerogenus</i>            | <i>Enterobacter cloacae</i>         | 2.234 | <i>Enterobacter cancerogenus</i>            |
| 129     | <i>Enterobacter gergoviae</i>               | <i>Enterobacter cloacae</i>         | 2.279 | <i>Enterobacter gergoviae</i>               |
| 600     | <i>Fusobacterium nucleatum</i>              | <i>Fusobacterium naviforme</i>      | 1.924 | <i>Fusobacterium nucleatum</i>              |
| 541     | <i>Klebsiella oxytoca</i>                   | <i>Raoultella ornithinolytica</i>   | 2.589 | <i>Klebsiella oxytoca</i>                   |
| 451     | <i>Nocardia brasiliensis</i>                | <i>Nocardia sp</i>                  | 1.778 | <i>Nocardia brasiliensis</i>                |
| 1046    | <i>Peptoniphilus gorbachii</i>              | <i>Pseudomonas trivialis</i>        | 1.325 | <i>Peptoniphilus gorbachii</i>              |
| 1026    | <i>Prevotella amnii</i>                     | <i>Acinetobacter parvus</i>         | 1.412 | <i>Prevotella amnii</i>                     |
| 5       | <i>Providencia rustigianii</i>              | <i>Providencia stuartii</i>         | 2.185 | <i>Providencia stuartii</i>                 |
| 699     | <i>Shigella flexneri</i>                    | <i>Escherichia coli</i>             | 2.389 | <i>Shigella flexneri</i>                    |
| 698     | <i>Shigella sonnei</i>                      | <i>Escherichia coli</i>             | 2.336 | <i>Shigella sonnei</i>                      |
| 289     | <i>Streptococcus intermedius</i>            | <i>Streptococcus constellatus</i>   | 1.928 | <i>Streptococcus intermedius</i>            |
| 447     | <i>Streptococcus intermedius</i>            | <i>Streptococcus constellatus</i>   | 1.906 | <i>Streptococcus intermedius</i>            |
| 460     | <i>Streptococcus mitis</i>                  | <i>Streptococcus pneumoniae</i>     | 2.032 | <i>Streptococcus mitis</i>                  |
| 580     | <i>Vibrio cholerae</i>                      | <i>Vibrio albensis</i>              | 1.935 | <i>Vibrio cholerae</i>                      |

Table S4: MALDI-TOF MS top10 results for isolates where the correct standard method identification was not the top result.

| Isolate No. | Top MALDI match                     | Top Score | 2° Std method ID/2° MALDI match                    | 2° score     | % Below Top | Category | Notes                           |
|-------------|-------------------------------------|-----------|----------------------------------------------------|--------------|-------------|----------|---------------------------------|
| 177         | <i>Bordetella bronchiseptica</i>    | 2.264     | <i>Bordetella pertussis</i>                        | 2.018        | 10.87       | B        |                                 |
| 150         | <i>Burkholderia cenocepacia</i>     | 1.995     | <i>Burkholderia cepacia</i>                        | 1.938        | 2.86        | B        | both <i>B. cepacia</i> complex  |
| 645         | <i>Burkholderia cenocepacia</i>     | 2.474     | <i>Burkholderia cepacia</i>                        | 2.268        | 8.33        | B        | both <i>B. cepacia</i> complex  |
| 17          | <i>Citrobacter braakii</i>          | 2.188     | <i>Citrobacter freundii</i>                        | 2.027        | 7.36        | B        | both <i>C. freundii</i> complex |
| 15          | <i>Citrobacter freundii</i>         | 2.161     | <i>Citrobacter braakii</i>                         | 1.915        | 11.38       | B        | both <i>C. freundii</i> complex |
| 265         | <i>Corynebacterium minutissimum</i> | 2.016     | <i>Corynebacterium aurimucosum</i>                 | 1.914        | 5.06        | B        |                                 |
| 547         | <i>Corynebacterium propinquum</i>   | 2.204     | <u><i>Corynebacterium pseudodiphtheriticum</i></u> | <u>1.837</u> | 16.65       | A        |                                 |
| 600         | <i>Fusobacterium naviforme</i>      | 1.924     | <b><i>Fusobacterium nucleatum</i></b>              | <b>1.546</b> | 19.65       | A        |                                 |
| 541         | <i>Raoultella ornithinolytica</i>   | 2.589     | <i>Klebsiella oxytoca</i>                          | 2.19         | 15.41       | C        |                                 |
| 289         | <i>Streptococcus constellatus</i>   | 1.928     | <u><i>Streptococcus intermedius</i></u>            | <u>1.791</u> | 7.11        | A        | both <i>S. anginosus</i> group  |
| 447         | <i>Streptococcus constellatus</i>   | 1.906     | <u><i>Streptococcus intermedius</i></u>            | <u>1.788</u> | 6.19        | A        | both <i>S. anginosus</i> group  |

Underlining means secondary match is a genus-only ID score. Bold means secondary match is an unreliable ID score
